# Supplementary material for: Synthesis of novel 5-alkyl/aryl/heteroaryl substituted diethyl 3,4-dihydro-2H-pyrrole-4,4-dicarboxylates by aziridine ring expansion of 2-[(aziridin-1-yl)-1-alkyl/aryl/heteroaryl-methylene]malonic acid diethyl esters
Source: publisher site journal article supplement (doi:10.3762/bjoc.7.95), 2011-06-20
Supplement: Additional file 1 [file 1860-5397-7-95-S1.pdf]

# Supporting Information

for

## **Synthesis of novel 5-alkyl/aryl/heteroaryl substituted diethyl 2*H*-pyrrole-4,4(3*H*)-dicarboxylates by aziridine ring expansion of 2-[(aziridin-1-yl)-1-alkyl/aryl/heteroaryl-methylene]malonic acid diethyl esters**

Satish S. More\*<sup>1</sup>, T. Krishna Mohan<sup>1</sup>, Y. Sateesh Kumar<sup>1</sup>, U. K. Syam Kumar<sup>1</sup> and Navin B. Patel<sup>2</sup>

Address: <sup>1</sup>Technology Development centre, Custom Pharmaceutical Services, Dr. Reddy's Laboratories Ltd., Miyapur, Hyderabad -500 049, India and <sup>2</sup>Department of Chemistry, Veer Narmad South Gujarat University, Surat, India

Email: Satish S. More\* - satishsm@drreddys.com

\* Corresponding author

General information, experimental procedures, spectral data of compounds **18f–18j, 19b, 19c, 19f–19g, 19i, 20a–20j, 21a–21j, 23, 24, 28, 29, 31, 32**, spectra of **20a, 20c, 20d, 20f, 20g, and 20h** (<sup>1</sup>H NMR, <sup>13</sup>C NMR, IR, MS).

## Table of contents

| Content                                                                                                                                                      | Page |
|--------------------------------------------------------------------------------------------------------------------------------------------------------------|------|
| 1. General information .....                                                                                                                                 | S4   |
| 2. General procedures .....                                                                                                                                  | S5   |
| 2.1. General procedure for preparation of <i>N</i> -vinylaziridines <b>20a–20j</b> .....                                                                     | S5   |
| 2.2. General procedure for the iodide ion mediated ring expansion reactions<br>of <i>N</i> -vinylaziridines.....                                             | S5   |
| 3. Spectral data of novel diethyl 2-acylmalonates.....                                                                                                       | S6   |
| 3.1. Spectral data of Diethyl 2-(3-chlorobenzoyl)malonate ( <b>18f</b> ).....                                                                                | S6   |
| 3.2. Diethyl 2-(4-fluorobenzoyl)malonate ( <b>18g</b> ) .....                                                                                                | S6   |
| 3.3. Diethyl 2-(3-methoxybenzoyl)malonate ( <b>18i</b> ) .....                                                                                               | S6   |
| 4. Spectral data of known diethyl 2-acylmalonates for which no spectral<br>characterization was reported in literature .....                                 | S7   |
| 4.1. Diethyl 2-(4-nitrobenzoyl)malonate ( <b>18h</b> ) .....                                                                                                 | S7   |
| 4.2. Diethyl 2-(thiophene-2-carbonyl)malonate ( <b>18j</b> ).....                                                                                            | S7   |
| 5. Spectral data of novel 2-chloromethylenemalonates .....                                                                                                   | S7   |
| 5.1. Diethyl 2-(chloro (3-chlorophenyl)methylene)malonate ( <b>19f</b> ).....                                                                                | S7   |
| 5.2. Diethyl 2-(chloro(4-fluorophenyl)methylene)malonate ( <b>19g</b> ).....                                                                                 | S8   |
| 5.3. Diethyl 2-(chloro(3-methoxyphenyl)methylene)malonate ( <b>19i</b> ) .....                                                                               | S8   |
| 6. Spectral data of known 2-chloromethylenemalonic acid diethyl ester derivatives<br>for which no spectral characterization was reported in literature ..... | S8   |
| 6.1. Diethyl 2-(1-chloropropylidene)malonate ( <b>19b</b> ).....                                                                                             | S8   |
| 6.2. Diethyl 2-(1-chlorobutylidene)malonate ( <b>19c</b> ).....                                                                                              | S8   |
| 7. Spectral data of 2-(aziridin-1-yl-1-alkyl/ aryl/heteroaryl methylene)malonates<br>( <b>20a–20j</b> ) .....                                                | S9   |
| 7.1. 2-(1-Aziridin-1-yl-ethylidene)malonic acid diethyl ester ( <b>20a</b> ) .....                                                                           | S9   |
| 7.2. 2-(1-Aziridin-1-yl-propylidene)malonic acid diethyl ester ( <b>20b</b> ) .....                                                                          | S9   |
| 7.3. 2-(1-Aziridin-1-yl-butylidene)malonic acid diethyl ester ( <b>20c</b> ) .....                                                                           | S9   |
| 7.4. 2-(1-Aziridin-1-yl-2,2-dimethyl-propylidene)malonic acid diethyl ester ( <b>20d</b> )                                                                   | S10  |
| 7.5. 2-(Aziridin-1-yl-phenylmethylene)malonic acid diethyl ester ( <b>20e</b> ) .....                                                                        | S10  |
| 7.6. 2-[Aziridin-1-yl-(3-chlorophenyl)methylene]malonic acid diethyl ester ( <b>20f</b> ). S10                                                               |      |
| 7.7. 2-[Aziridin-1-yl-(4-fluorophenyl)methylene]malonic acid diethyl ester ( <b>20g</b> )                                                                    | S10  |

|       |                                                                                                                                                                                        |     |
|-------|----------------------------------------------------------------------------------------------------------------------------------------------------------------------------------------|-----|
| 7.8.  | 2-[Aziridin-1-yl-(4-nitrophenyl)methylene]malonic acid diethyl ester ( <b>20h</b> )                                                                                                    | S11 |
| 7.9.  | 2-[Aziridin-1-yl-(3-methoxyphenyl)methylene]malonic acid diethyl ester<br>( <b>20i</b> )                                                                                               | S11 |
| 7.10. | 2-[(Aziridin-1-yl)-(thiophen-2-yl)methylene]malonic acid diethyl ester ( <b>20j</b> )                                                                                                  | S11 |
| 8.    | Spectral data of diethyl 5-alkyl/aryl/heteroaryl substituted 3,4-dihydro-2 <i>H</i> -<br>pyrrole-4,4-dicarboxylates ( <b>21a–21j</b> )                                                 | S12 |
| 8.1.  | Diethyl 3,4-dihydro-5-methyl-2 <i>H</i> -pyrrole-4,4-dicarboxylate ( <b>21a</b> )                                                                                                      | S12 |
| 8.2.  | Diethyl 3,4-dihydro-5-ethyl-2 <i>H</i> -pyrrole-4,4-dicarboxylate ( <b>21b</b> )                                                                                                       | S12 |
| 8.3.  | Diethyl 3,4-dihydro-5-propyl-2 <i>H</i> -pyrrole-4,4-dicarboxylate ( <b>21c</b> )                                                                                                      | S12 |
| 8.4.  | Diethyl 3,4-dihydro-5- <i>tert</i> -butyl-2 <i>H</i> -pyrrole-4,4-dicarboxylate ( <b>21d</b> )                                                                                         | S12 |
| 8.5.  | Diethyl 3,4-dihydro-5-phenyl-2 <i>H</i> -pyrrole-4,4-dicarboxylate ( <b>21e</b> )                                                                                                      | S13 |
| 8.6.  | Diethyl 5-(3-chlorophenyl)-3,4-dihydro-2 <i>H</i> -pyrrole-4,4-dicarboxylate ( <b>21f</b> )                                                                                            | S13 |
| 8.7.  | Diethyl 3,4-dihydro-5-(4-fluorophenyl)-2 <i>H</i> -pyrrole-4,4-dicarboxylate ( <b>21g</b> )                                                                                            | S13 |
| 8.8.  | Diethyl 3,4-dihydro-5-(4-nitrophenyl)-2 <i>H</i> -pyrrole-4,4-dicarboxylate ( <b>21h</b> )                                                                                             | S14 |
| 8.9.  | Diethyl 3,4-dihydro-5-(3-methoxyphenyl)-2 <i>H</i> -pyrrole-4,4-dicarboxylate<br>( <b>21i</b> )                                                                                        | S14 |
| 8.10. | Diethyl 3,4-dihydro-5-(thiophen-2-yl)-2 <i>H</i> -pyrrole-4,4-dicarboxylate ( <b>21j</b> )                                                                                             | S14 |
| 9.    | Spectral data of <b>23</b> , <b>24</b> , <b>28</b> , <b>29</b> , <b>30</b> , <b>31</b> and <b>32</b> .                                                                                 | S15 |
| 9.1.  | 5-phenyl-3,4-dihydro-2 <i>H</i> -pyrrole ( <b>23</b> )                                                                                                                                 | S15 |
| 9.2.  | Ethyl 5-phenyl-3,4-dihydro-2 <i>H</i> -pyrrole-4-carboxylate ( <b>24</b> )                                                                                                             | S15 |
| 9.3.  | Ethyl 3-(aziridin-1-yl)-2-cyano-3-phenylacrylate ( <b>28</b> )                                                                                                                         | S15 |
| 9.4.  | Ethyl 4-cyano-5-phenyl-3,4-dihydro-2 <i>H</i> -pyrrole-4-carboxylate ( <b>29</b> )                                                                                                     | S15 |
| 9.5.  | 2-Butylaziridine ( <b>30</b> )                                                                                                                                                         | S16 |
| 9.6.  | Diethyl 2-[(2-butylaziridin-1-yl)phenylmethylene]malonate ( <b>31</b> )                                                                                                                | S16 |
| 9.7.  | Diethyl 2-butyl-3,4-dihydro-5-phenyl-2 <i>H</i> -pyrrole-4,4-dicarboxylate ( <b>32</b> )                                                                                               | S16 |
| 10.   | References                                                                                                                                                                             | S17 |
| 11.   | Spectra of 2-[(aziridin-1-yl)-1-alkyl/aryl/heteroaryl-methylene]malonic acid<br>diethyl esters ( <i>N</i> -vinyl aziridines) - <b>20a</b> , <b>20c</b> , <b>20d</b> , <b>20f–20h</b> . | S18 |

## 1. General information

All the required acid chlorides were freshly distilled prior to use. Aziridine was synthesized from ethanolamine and purified by fractional distillation. Laboratory grade (LR grade) solvents and reagents were used in the reactions. Reactions were monitored by TLC, using Merck aluminium-backed plates precoated with silica (0.25 mm, 60, F254). The plates were visualized under UV light and developed using a solution of basic  $\text{KMnO}_4$ . Chromatographic purification of products was carried out by gravity column chromatography on silica gel (60–120 mesh), purchased from SRL. Infrared spectra were recorded on a Perkin–Elmer 1650 Fourier transform spectrometer. NMR spectra were measured in  $\text{CDCl}_3$ , (all with TMS as internal standard) on Varian Gemini 200 MHz FT and 400 MHz FT magnetic resonance spectrometers. Chemical shifts ( $\delta$ ) are reported in ppm, and coupling constants ( $J$ ) in Hz. The following abbreviations were used for multiplicities: s = singlet, d = doublet, t = triplet, q = quartet, m = multiplet. MS spectra were recorded on an HP-5989A quadrupole mass spectrometer.

The synthesis of diethyl acyl malonates **18** was carried by the method of Rathke and Cowan [1] and the physical and spectral data were compared with the literature values [1,2]. Compound **18h** [3] and **18j** [4] have been previously reported, however, since no spectral characterization was given, the spectral data were recorded and results reported below. Compound **18f**, **18g**, and **18i** were novel and were characterized by MS and NMR and IR spectroscopy.

The chlorination of diethyl 2-acylmalonates **18** was carried out by the method of Horni [5] and the physical and spectral data of 2-(1-alkyl/aryl/heteroaryl-1-chloromethylene)malonates **19** were compared with the literature reports [6-8].

Compounds **19f**, **19g**, and **19i** were novel and were characterized by MS, NMR and IR spectroscopy. Compound **19b** and **19c** have been previously reported [9], however, since no spectral characterization was given, the spectral data were recorded and results reported below.

The synthesis of *N*-vinylaziridines **20** was carried out on a maximum of 24 mmol and minimum of 15 mmol scale whereas their rearrangement to pyrroline derivatives **21** was carried out on a maximum of 21 mmol and a minimum of 10 mmol scale.

Compound **23** was reported as perchlorate salt [10], but we isolated **23** in the form of a free base. Compound **24**, although reported in literature [11], was not completely characterized. We have carried out characterization of **24** by NMR and MS and HRMS and the spectral results of **24** were found to be similar to its methyl ester analogue [12].

The synthesis of ethyl 3-chloro-2-cyano-3-phenylacrylate (**27**) was carried out by a known procedure via the acylation of ethyl cyanoacetate with benzoyl chloride and subsequent chlorination of ethyl 2-benzoylcianoacetate with phosphorus oxychloride [13]. The synthesis of 2-butylaziridine **30** was carried by the general procedure reported in a patent [14] from ( $\pm$ ) norleucinol instead of (*S*)-(+)-leucinol.

## 2. General procedures

### 2.1. General procedure for preparation of *N*-vinylaziridines 20a–20j

The chloro alkenyl malonate derivative (16.1 mmol) and THF (40.0 mL) were placed in a round bottom flask and cooled to 0–10 °C. Aziridine (48.2 mmol) was added slowly over 15 minutes through a syringe to the above mixture. The reaction mixture was then raised to room temperature and stirred for 8–13 h. After disappearance of the starting chloro compound (TLC), the reaction was quenched with water (80 mL). The reaction mixture was extracted twice with 80 mL dichloromethane. The combined extracts were washed twice with 80 mL 10% sodium chloride solution. The organic layer was dried over Na<sub>2</sub>SO<sub>4</sub> and concentrated under vacuum to afford the *N*-vinylaziridines. The products were sufficiently pure for the subsequent reactions; however, the crude products were purified by chromatography on silica gel (60–120 mesh) using a mixture of hexanes and ethyl acetate (90:10) as eluent, and the spectral data recorded for the column purified products, which were used for the next step (for yields see Table 1).

### 2.2. General procedure for the ring expansion of *N*-vinylaziridines to synthesize pyrrolines 21a–21j

Anhydrous sodium iodide (4.5 g, 30 mmol) was added to a solution of the *N*-vinylaziridine derivative (15 mmol) in acetone (40.0 mL) under a nitrogen atmosphere and the reaction mixture stirred for 12–24 h at room temperature. After disappearance of the *N*-vinylaziridine (TLC), the reaction mixture was diluted with water (80 mL) and extracted three times with 80 mL DCM. The combined DCM layers were washed twice with 80 mL of 10% sodium chloride solution, dried over Na<sub>2</sub>SO<sub>4</sub> and concentrated under vacuum to afford the crude pyrroline derivatives which were purified by column chromatography on silica gel (60–120 mesh) with a mixture of hexanes and ethyl acetate (95:5) as eluent to afford the pure pyrrolines **21**.

### 3. Spectral data of novel diethyl acyl malonates

#### 3.1. Diethyl 2-(3-chlorobenzoyl)malonate (18f)

M.F.: C<sub>14</sub>H<sub>15</sub>ClO<sub>5</sub>, Mol. Wt: 298.72

IR (neat, cm<sup>-1</sup>): 3651, 3070, 2984, 1754, 1734, 1698, 1571, 1424, 1369, 1301, 1249, 1151, 1095, 1031, 797, 744, 682, 616; <sup>1</sup>H NMR (CDCl<sub>3</sub>, 400 MHz) δ: 13.4 and 5.21 (s, 1H), 7.88 (s, 1H), 7.769–7.762 (m, 1H), 7.57–7.55 (m, 1H), 4.29–4.0 (m, 4H), 1.25 and 1.05 (t, *J* = 7.2 Hz, 6H); <sup>13</sup>C NMR (CDCl<sub>3</sub>, 50 MHz) δ: 187 and 173, 164.39, 136.9, 134.3, 133.3, 130.11, 128.49, 126.48, 125.7 and 61.39, 62.52 and 61.84, 14.06 and 13.88; MS (ESI): *m/z* = 299.1 [M + H]<sup>+</sup>.

#### 3.2. Diethyl 2-(4-fluorobenzoyl)malonate (18g)

M.F.: C<sub>14</sub>H<sub>15</sub>FO<sub>5</sub>, Mol. Wt: 282.26

IR (neat, cm<sup>-1</sup>): 3070, 2990, 2876, 1751, 1733, 1691, 1594, 1508, 1478, 1447, 1413, 1371, 1296, 1230, 1185, 1160, 1034, 1006, 907, 852, 817, 635, 580; <sup>1</sup>H NMR (CDCl<sub>3</sub>, 400 MHz) δ: 7.96–7.92 (m, 2H), 7.16 (t, *J* = 8.6 Hz, 2H), 13.4 & 5.22 (s, 1H), 4.28 (q, *J* = 7.0 Hz, 4H), 1.25 (t, *J* = 7.4 Hz, 6H); <sup>13</sup>C NMR (CDCl<sub>3</sub>, 50 MHz) δ: 187.3, 168.7, 164.6 & 163.5, 131.7, 131.3 & 131.1, 116.3 & 115.8, 62.48 & 61.88, 61.7 & 61.3, 13.9, MS (ESI): *m/z* = 283.1 [M + H]<sup>+</sup>.

#### 3.3. Diethyl 2-(3-methoxybenzoyl)malonate (18i)

M.F.: C<sub>15</sub>H<sub>18</sub>O<sub>6</sub>, Mol. Wt: 294.30

IR (neat, cm<sup>-1</sup>): 3077, 2983, 2839, 1754, 1736, 1693, 1598, 1583, 1487, 1450, 1431, 1369, 1293, 1234, 1178, 1095, 1037, 868, 789, 686; <sup>1</sup>H NMR (CDCl<sub>3</sub>, 400 MHz) δ: 13.4 and 5.26 (s, 1H), 7.47–7.0 (m, 4H), 4.27 (q, *J* = 7.0 Hz, 4H), 3.85 (s, 3H), 1.25 (t, 6H, 7.2 Hz); <sup>13</sup>C NMR (CDCl<sub>3</sub>, 100 MHz) δ: 171.6, 166.6, 159.5, 130.6, 129.4, 122.5, 120.3, 114.4, 61.4, 55.3, 41.6, 13.9 MS (ESI): *m/z* = 295.2 [M + H]<sup>+</sup>.

## 4. Spectral data of known diethyl 2-acylmalonates for which no spectral characterization was reported before in literature

### 4.1. Diethyl 2-(4-nitrobenzoyl)malonate (18h)

M.F.: C<sub>14</sub>H<sub>15</sub>NO<sub>7</sub>, Mol. Wt: 309.27

IR (neat, cm<sup>-1</sup>): 3112, 2985, 2874, 1754, 1732, 1701, 1649, 1605, 1588, 1529, 1466, 1370, 1348, 1297, 1252, 1147, 1084, 1036, 855, 767, 687; <sup>1</sup>H NMR (CDCl<sub>3</sub>, 400 MHz) δ : 13.4 and 5.5 (s,s, 1H), 8.34 and 8.27 (d, *J* = 8.8 Hz, and d, *J* = 8.8 Hz, 2H), 8.08 and 7.75 (d, *J* = 7.2 Hz, and d, *J* = 8.8 Hz, 2H), 4.39–4.07 (m, 4H), 1.08–1.38 (m, 6H); <sup>13</sup>C NMR (CDCl<sub>3</sub>, 50 MHz) δ: 187.6 and 164.1, 172.2 and 170.5, 166.5 and 165.2, 150.6 and 149.0, 139.8 and 139.8, 129.5 and 128.7, 124.0 and 123.4, 101.9 and 41.6, 62.7 and 62.1, 61.5 and 61.4, 14.0 and 13.9, MS (ESI): *m/z* = 310.1 [M + H]<sup>+</sup>.

### 4.2. Diethyl 2-(thiophene-2-carbonyl)malonate (18j)

M.F.: C<sub>12</sub>H<sub>14</sub>O<sub>5</sub>S, Mol. Wt: 270.30

IR (neat, cm<sup>-1</sup>): 3460, 3106, 2985, 1735, 1670, 1519, 1446, 1413, 1305, 1245, 1179, 1035, 854, 736, 616; <sup>1</sup>H NMR (CDCl<sub>3</sub>, 400 MHz) δ: 13.26 and 5.14 (s, s, 1H), 7.69–7.73 (m, 2H), 7.14 (dd, *J*=3.8 Hz, *J*= 5.0 Hz, 1H), 4.18–4.32 (m, 4H), 1.24–1.32 (m, 6H); <sup>13</sup>C NMR (CDCl<sub>3</sub>, 50 MHz) δ: 181.1, 164.2, 142.2, 135.3, 133.1, 128.3, 62.46 and 62.40, 13.8; MS (ESI): *m/z* = 271.1 [M + H]<sup>+</sup>.

## 5. Spectral data of novel diethyl 2-chloromethylenemalonates

### 5.1. Diethyl 2-(chloro(3-chlorophenyl)methylene)malonate (19f)

M.F.: C<sub>14</sub>H<sub>14</sub>Cl<sub>2</sub>O<sub>4</sub>, Mol Wt: 316.03

IR (neat): 3454; 3067, 2983, 1732, 1621, 1567, 1472, 1446, 1390, 1367, 1249, 1208, 1079, 1019, 935, 864, 788, 717, 690; <sup>1</sup>H NMR (400 MHz, CDCl<sub>3</sub>) δ: 7.42–7.29 (m, 4H ArH), 4.35 (q, *J* = 7.2 Hz, 2H), 4.09 (q, *J* = 6.9 Hz, 2H), 1.36 (t, *J* = 7.6, 3H), 1.07 (t, *J* = 8.0Hz, 3H); <sup>13</sup>C NMR (50 MHz, CDCl<sub>3</sub>) δ: 163.0, 162.3, 145.3, 138.3, 134.1, 130.2, 129.4, 128.1, 127.8, 126.2, 62.1, 14.0; MS (ESI): *m/z* = 339.0 [M + Na]<sup>+</sup>.

### 5.2. Diethyl 2-(chloro(4-fluorophenyl)methylene)malonate (19g)

M.F.: C<sub>14</sub>H<sub>14</sub>ClFO<sub>4</sub>, Mol. Wt: 300.71.

IR (neat): 3452; 3109, 2985, 1732, 1601, 1507, 1368, 1301, 1253, 1227, 1160, 1079, 1015, 908, 841. <sup>1</sup>H NMR (400 MHz, CDCl<sub>3</sub>) δ: 7.45–7.40 (m, 2H), 7.10–7.05 (m, 2H), 4.35 (q, *J* = 7.0 Hz, 2H), 4.06 (q, *J* = 7.3 Hz, 2H), 1.36 (t, *J* = 7.0 Hz, 3H), 1.08 (t, *J* = 7.2 Hz, 3H); <sup>13</sup>C NMR (50 MHz, CDCl<sub>3</sub>) δ: 166.1, 163.1, 162.5 & 161.1, 146.1, 132.8 & 130.4, 127.2, 115.5, & 115.11, 61.9 & 61.7, 13.9 & 13.6; MS (ESI): *m/z* = 301.0 [M + H]<sup>+</sup>.

### 5.3. Diethyl 2-(chloro(3-methoxyphenyl)methylene)malonate (19i)

M.F.: C<sub>15</sub>H<sub>17</sub>ClO<sub>5</sub>, Mol. Wt: 312.75

IR (neat): 3453, 3071, 2983, 1732, 1597, 1485, 1465, 1390, 1368, 1290, 1228, 1174, 1164, 1078, 1039, 1023, 949, 921, 865, 788, 761, 695; <sup>1</sup>H NMR (400 MHz, CDCl<sub>3</sub>) δ: 7.30–7.27(d, *J* = 3.2 Hz, 1H), 7.01–6.93 (m, 2H), 4.35 (q, *J* = 7.3 Hz, 2H), 4.07 (q, *J* = 7.2 Hz, 2H), 3.8 (s, 3H), 1.36 (t, *J* = 7.0 Hz, 3H), 1.05 (t, *J* = 6.8 Hz, 3H); <sup>13</sup>C NMR (50 MHz, CDCl<sub>3</sub>) δ: 163.2, 162.8, 159.2, 146.9, 138.0, 129.2, 127.1, 120.3, 116.2, 113.3, 61.9, 61.7, 55.3, 14.0, 13.6; MS (ESI): *m/z* = 335.1 [M + Na]<sup>+</sup>.

## 6. Spectral data of known 2-chloromethylenemalonic acid diethyl ester derivatives for which no spectral characterization was reported in literature

### 6.1. Diethyl 2-(1-chloropropylidene)malonate (19b)

M.F.: C<sub>10</sub>H<sub>15</sub>ClO<sub>4</sub>, Mol. Wt: 234.68

IR (neat): 2982, 2940, 1727, 1626, 1461, 1389, 1367, 1286, 1258, 1230, 1044, 1062, 905, 866, 755, 667; <sup>1</sup>H NMR (400 MHz, CDCl<sub>3</sub>) δ: 4.32 (q, *J* = 6.8 Hz, 2H), 4.24 (q, *J* = 6.4 Hz, 2H), 2.92 (q, *J* = 7.2 Hz, 2H), 1.33 (t, *J* = 7.4 Hz, 3H) 1.29 (t, *J* = 7.2 Hz, 3H), 1.23 (t, *J* = 7.4 Hz, 3H); <sup>13</sup>C NMR (50 MHz, CDCl<sub>3</sub>) δ: 164.1, 162.0, 155.7, 125.8, 61.6 and 61.5, 30.4, 13.9, 12.0; MS (ESI): *m/z* = 235.1 [M + H]<sup>+</sup>.

### 6.2. Diethyl 2-(1-chlorobutylidene)malonate (19c)

M.F.: C<sub>11</sub>H<sub>17</sub>ClO<sub>4</sub>, Mol. Wt: 248.70

IR (neat): 3441, 2967, 2875, 1735, 1625, 1465, 1388, 1367, 1274, 1245, 1223, 1141, 1086, 1055, 1022, 921, 865, 759, 665; <sup>1</sup>H NMR (400 MHz, CDCl<sub>3</sub>) δ: 4.30 (q, *J* = 7.0 Hz,



2H), 4.22 (q,  $J = 7.2$  Hz, 2H), 2.88-2.92 (m, 2H), 1.69–1.75 (m, 2H), 1.27–1.34 (m, 6H), 0.98 (t,  $J = 7.4$  Hz, 3H);  $^{13}\text{C}$  NMR (50 MHz,  $\text{CDCl}_3$ )  $\delta$ : 164.2, 162.1, 154.3, 126.6, 61.6, 38.4, 21.0, 13.9; MS (ESI):  $m/z = 271.1$  [ $\text{M} + \text{Na}$ ] $^+$ .

## 7. Spectral data of 2-(aziridin-1-yl-1-alkyl/aryl/heteroaryl methylene)malonates (20a–20j)

### 7.1. 2-(1-Aziridin-1-yl-ethylidene)malonic acid diethyl ester (20a)

M.F.:  $\text{C}_{11}\text{H}_{17}\text{NO}_4$ , Mol. Wt: 227.26

IR (neat): 2981, 1704, 1646, 1591, 1446, 1381, 1225, 1182, 1142, 1061, 973, 868, 773;  $^1\text{H}$  NMR ( $\text{CDCl}_3$ , 400 MHz)  $\delta$ : 4.27 (q,  $J = 7.2$  Hz, 2H), 4.19 (q,  $J = 7.06$  Hz, 2H), 2.24 (s, 3H), 2.17 (s, 4H), 1.26 (t,  $J = 7.2$  Hz, 3H), 1.22 (t,  $J = 7.2$  Hz, 3H);  $^{13}\text{C}$  NMR ( $\text{CDCl}_3$ , 50 MHz)  $\delta$ : 165.9, 165.3, 109.9, 60.6, 60.3, 28.8, 20.0, 14.1; MS (ESI):  $m/z = 228.1$  [ $\text{M} + \text{H}$ ] $^+$ .

### 7.2. 2-(1-Aziridin-1-yl-propylidene)malonic acid diethyl ester (20b)

M.F.:  $\text{C}_{12}\text{H}_{19}\text{NO}_4$ , Mol. Wt: 241.28

IR (neat,  $\text{cm}^{-1}$ ): 3405, 2981, 2939, 1707, 1587, 1464, 1383, 1367, 1260, 1221, 1179, 1142, 1095, 1065, 1034, 941, 814, 676;  $^1\text{H}$  NMR ( $\text{CDCl}_3$ , 400 MHz)  $\delta$ : 4.26 (q,  $J = 7.2$  Hz, 2H), 4.20 (q,  $J = 7.0$  Hz, 2H), 2.56 (dd,  $J = 6.0, 7.8$  Hz, 2H), 2.18 (s, 4H), 1.2–1.4 (m, 9H);  $^{13}\text{C}$  NMR ( $\text{CDCl}_3$ , 50 MHz)  $\delta$ : 169.7, 165.9, 109.1, 60.6, 60.4, 28.3, 26.8, 14.2, 14.1, 12.9; MS (ESI):  $m/z = 242.2$  [ $\text{M} + \text{H}$ ] $^+$ .

### 7.3. 2-(1-Aziridin-1-yl-butylidene)malonic acid diethyl ester (20c)

M.F.:  $\text{C}_{13}\text{H}_{21}\text{NO}_4$ , Mol. Wt: 255.31

IR (neat,  $\text{cm}^{-1}$ ): 3070, 2978, 2874, 1705, 1586, 1464, 1378, 1241, 1218, 1178, 1141, 1096, 1063, 1039, 985, 868, 811, 756, 667;  $^1\text{H}$  NMR ( $\text{CDCl}_3$ , 400 MHz)  $\delta$ : 4.28 (q,  $J = 7.0$  Hz, 2H), 4.20 (q,  $J = 7.0$  Hz, 2H), 2.58–2.54 (m, 2H), 2.18 (s, 4H), 1.69–1.65 (m, 2H), 1.30 (t,  $J = 7.6$  Hz, 3H), 1.27 (t,  $J = 7.2$  Hz, 3H), 0.989 (t,  $J = 7.4$  Hz, 3H);  $^{13}\text{C}$  NMR ( $\text{CDCl}_3$ , 50 MHz)  $\delta$ : 168.4, 166.0, 165.8, 109.6, 60.5, 60.4, 35.2, 28.5, 21.9, 14.17, 14.11, 14.0; MS (ESI):  $m/z = 256.2$  [ $\text{M} + \text{H}$ ] $^+$ , 278.2 [ $\text{M} + \text{Na}$ ] $^+$ .

#### 7.4. 2-(1-Aziridin-1-yl-2,2-dimethylpropylidene)malonic acid diethyl ester (20d)

M.F.: C<sub>14</sub>H<sub>23</sub>NO<sub>4</sub>, Mol. Wt: 269.34

IR (neat, cm<sup>-1</sup>): 3069, 2979, 2874, 1712, 1557, 1471, 1399, 1365, 1260, 1224, 1198, 1145, 1095, 1059, 957, 869, 818, 772, 692; <sup>1</sup>H NMR (CDCl<sub>3</sub>, 400 MHz) δ: 4.21 (q, *J* = 7.0 Hz, 4H), 2.18 (s, 4H), 1.34(s, 9H), 1.27 (t, *J* = 7.2 Hz, 6H); <sup>13</sup>C NMR (CDCl<sub>3</sub>, 50 MHz) δ: 173.8, 166.6, 111.1, 60.6, 38.5, 30.6, 29.7, 13.9; MS (ESI): *m/z* = 270 [M + H]<sup>+</sup>, 292.2 [M + Na]<sup>+</sup>.

#### 7.5. 2-(Aziridin-1-yl-phenylmethylene)malonic acid diethyl ester (20e)

M.F.: C<sub>16</sub>H<sub>19</sub>NO<sub>4</sub>, Mol. Wt: 289.34

IR (neat, cm<sup>-1</sup>): 3061, 2981, 2902, 1708, 1570, 1489, 1469, 1444, 1369, 1280, 1240, 1205, 1143, 1089, 1053, 939, 920, 860, 759, 700, 624; <sup>1</sup>H NMR (CDCl<sub>3</sub>, 400 MHz) δ: 7.41–7.32 (m, 5H), 4.32–4.26 (m, 2H), 3.95–3.90 (m, 2H), 2.21 (s, 4H), 1.33 (t, *J* = 7.2 Hz, 3H) 0.94 (t, *J* = 7.2 Hz, 3H); <sup>13</sup>C NMR (CDCl<sub>3</sub>, 100 MHz) δ: 165.9, 165.7, 164.13, 137.3, 128.8, 127.9, 127.2, 110.7, 60.6 and 60.58, 31.1, 14.1, 13.5 MS (ESI): *m/z* = 290.2 [M + H]<sup>+</sup>, 312.2 [M + Na]<sup>+</sup>.

#### 7.6. 2-[Aziridin-1-yl-(3-chlorophenyl)methylene]malonic acid diethyl ester (20f)

M.F.: C<sub>16</sub>H<sub>18</sub>ClNO<sub>4</sub>, Mol. Wt: 323.77

IR (neat, cm<sup>-1</sup>): 3423, 3067, 2981, 1715, 1602, 1581, 1473, 1413, 1370, 1284, 1240, 1207, 1145, 1091, 1055, 891, 864, 804, 784; <sup>1</sup>H NMR (CDCl<sub>3</sub>, 400 MHz) δ: 7.36–7.21 (m, 4H, ArH), 4.29 (q, *J* = 7.2 Hz, 2H), 3.98 (q, *J* = 7.0 Hz, 2H), 2.21 (s, 4H), 1.32 (t, *J* = 3.8 Hz, 3H), 1.01 (t, *J* = 7.0 Hz, 3H); <sup>13</sup>C NMR (CDCl<sub>3</sub>, 50 MHz) δ: 165.5, 164.1, 163.5, 138.9, 134.0, 129.4, 129.0, 127.5, 125.6, 116.1, 111.3, 60.8, 31.0, 30.1, 14.2, 13.68; MS (ESI): *m/z* = 346.1 [M + Na]<sup>+</sup>.

#### 7.7. 2-[Aziridin-1-yl-(4-fluorophenyl)methylene]malonic acid diethyl ester (20g)

M.F.: C<sub>16</sub>H<sub>18</sub>FNO<sub>4</sub>, Mol. Wt: 307.32

IR (neat, cm<sup>-1</sup>): 3073, 2938, 2874, 1715, 1605, 1579, 1507, 1474, 1370, 1277, 1207, 1145, 1089, 1054, 934, 864, 841, 789; <sup>1</sup>H NMR (CDCl<sub>3</sub>, 400 MHz) δ: 7.36–7.32 (m, 2H), 7.06–7.03 (m, 2H), 4.30 (q, *J* = 7.2 Hz, 2H), 3.97 (q, *J* = 7.0 Hz, 2H), 2.20 (s, 4H), 1.33 (t, *J* = 7.4 Hz, 3H), 1.01 (t, *J* = 7.2 Hz, 3H); <sup>13</sup>C NMR (CDCl<sub>3</sub>, 50 MHz) δ: 165.8, 165.4 & 164.3, 160.4, 133.3, 129.5 & 129.4, 115.4 & 114.9, 111.1, 60.8, 31.1, 14.2, 13.7; MS (ESI): *m/z* = 308.2 [M + H]<sup>+</sup>.

### 7.8. 2-[Aziridin-1-yl-(4-nitrophenyl)methylene]malonic acid diethyl ester (20h)

M.F.: C<sub>16</sub>H<sub>18</sub>N<sub>2</sub>O<sub>6</sub>, Mol. Wt: 334.32

IR (neat, cm<sup>-1</sup>): 3077, 2983, 2873, 1714, 1604, 1581, 1523, 1347, 1279, 1241, 1208, 1145, 1090, 1055, 857, 745, 700; <sup>1</sup>H NMR (CDCl<sub>3</sub>, 400 MHz) δ: 8.26 (dt, *J* = 2.0 Hz, *J* = 8.8 Hz, 2H), 7.52 (dt, *J* = 2.0 Hz, *J* = 8.8 Hz, 2H), 4.34 (q, *J* = 7.0 Hz, 2H), 3.99 (q, *J* = 7.0 Hz, 2H), 2.20 (s, 3H), 1.36 (t, *J* = 7.0 Hz, 3H), 1.03 (t, *J* = 7.0 Hz, 3H); <sup>13</sup>C NMR (CDCl<sub>3</sub>, 50 MHz) δ: 164.8, 164.4, 162.4, 147.9, 143.5, 128.7, 123.4, 111.8, 61.2, 61.0, 30.6, 29.7, 14.2, 13.8; MS (ESI): *m/z* = 335.1 [M + 1]<sup>+</sup>, 357.1 [M + Na]<sup>+</sup>.

### 7.9. 2-[Aziridin-1-yl-(3-methoxyphenyl)methylene]malonic acid diethyl ester (20i)

M.F.: C<sub>17</sub>H<sub>21</sub>NO<sub>5</sub>, Mol. Wt: 319.35

IR (neat, cm<sup>-1</sup>): 3072, 2981, 2938, 2837, 1714, 1574, 1465, 1370, 1290, 1177, 1143, 1093, 1053, 869, 787, 692; <sup>1</sup>H NMR (CDCl<sub>3</sub>, 400 MHz) δ: 7.28–7.24 (m, 1H), 6.92–6.89 (m, 3H), 4.30 (q, *J* = 7.2 Hz, 2H), 3.96 (q, *J* = 7.2 Hz, 2H), 3.79 (s, 3H), 2.22 (s, 3H), 1.33 (t, *J* = 7.2 Hz, 3H), 0.98 (t, *J* = 7.4 Hz, 3H); <sup>13</sup>C NMR (CDCl<sub>3</sub>, 100 MHz) δ: 166.0, 165.4, 164.0, 159.2, 138.6, 129.1, 119.6, 114.88, 112.5, 110.8, 60.7, 60.6, 60.1, 55.2, 31.3, 14.1, 13.6; MS (ESI): *m/z* = 320.2 [M + H]<sup>+</sup>.

### 7.10. 2-[(Aziridin-1-yl)-(thiophen-2-yl)methylene]malonic acid diethyl ester (20j)

M.F.: C<sub>14</sub>H<sub>17</sub>NO<sub>4</sub>S, Mol. Wt: 295.35

IR (neat, cm<sup>-1</sup>): 3637, 3103, 2981, 2610, 1710, 1574, 1370, 1278, 1221, 1144, 1052, 859, 713; <sup>1</sup>H NMR (CDCl<sub>3</sub>, 400 MHz) δ: 7.42 (dd, *J* = 1.2, *J* = 5.2 Hz, 1H), 7.20 (dd, *J* = 1.0, *J* = 3.6 Hz, 1H), 6.98 (dd, *J* = 3.6, 5.2 Hz, 1H), 4.28 (q, *J* = 7.2 Hz, 2H), 4.07 (q, *J* = 7.0 Hz, 2H), 2.29 (s, 4H), 1.31 (t, *J* = 7.0 Hz, 3H), 1.10 (t, *J* = 7.0 Hz, 3H); <sup>13</sup>C NMR (CDCl<sub>3</sub>, 50 MHz) δ: 166.3, 163.4, 158.3, 137.8, 128.3, 127.9, 126.4, 111.3, 61.1, 60.6, 32.4, 14.1, 13.7; MS (ESI): *m/z* = 296.1 [M + H]<sup>+</sup>, 318.1 [M + Na]<sup>+</sup>.

## 8. Spectral data of diethyl 5-alkyl/aryl/heteroaryl substituted 3,4-dihydro-2H-pyrrole-4,4-dicarboxylates (21a–21j)

### 8.1. Diethyl 3,4-dihydro-5-methyl-2H-pyrrole-4,4-dicarboxylate (21a)

M.F.: C<sub>11</sub>H<sub>17</sub>NO<sub>4</sub>, Mol. Wt: 227.26

IR (neat): 2982, 2936, 2874, 1731, 1651, 1595, 1446, 1367, 1263, 1178, 1093, 1060, 1023, 973, 927, 861, 796; <sup>1</sup>H NMR (CDCl<sub>3</sub>, 400 MHz) δ: 4.25 (q, *J* = 7.0 Hz, 4H), 3.87–3.83 (m, 2H), 2.56 (t, *J* = 6.8 Hz, 2H), 2.20 (s, 3H), 1.29 (t, *J* = 7.0 Hz, 6H); <sup>13</sup>C NMR (CDCl<sub>3</sub>, 50 MHz) δ: 168.4, 168.0, 71.3, 61.9, 58.8, 33.7, 18.0, 13.9; MS (ESI): *m/z* = 228 [M + H]<sup>+</sup>, 246 [M + Na]<sup>+</sup>; HRMS calculated for [C<sub>11</sub>H<sub>17</sub>NO<sub>4</sub> + H]<sup>+</sup>: 228.36, found 228.1231.

### 8.2. Diethyl 3,4-dihydro-5-ethyl-2H-pyrrole-4,4-dicarboxylate (21b)

M.F.: C<sub>12</sub>H<sub>19</sub>NO<sub>4</sub>, Mol. Wt: 241.28

IR (neat, cm<sup>-1</sup>): 3407, 2981, 2940, 1731, 1646, 1678, 1463, 1447, 1367, 1267, 1179, 1098, 991, 861, 666; <sup>1</sup>H NMR (CDCl<sub>3</sub>, 400 MHz) δ: 4.22 (q, *J* = 7.2 Hz, 4H), 3.88 (t, *J* = 2.2 Hz, 2H), 2.57–2.48 (m, 4H), 1.28 (t, *J* = 6.8 Hz, 6H), 1.20 (t, *J* = 7.2 Hz, 3H); <sup>13</sup>C NMR (CDCl<sub>3</sub>, 50 MHz) δ: 172.3, 168.6, 71.4, 61.9, 58.8, 33.9, 24.7, 13.9, 10.7; MS (ESI): *m/z* = 242 [M + H]<sup>+</sup>; HRMS calculated for [C<sub>12</sub>H<sub>19</sub>NO<sub>4</sub> + H]<sup>+</sup>: 242.1392, found 242.1388.

### 8.3. Diethyl 3,4-dihydro-5-propyl-2H-pyrrole-4,4-dicarboxylate (21c)

M.F.: C<sub>13</sub>H<sub>21</sub>NO<sub>4</sub>, Mol. Wt: 255.31

IR (neat, cm<sup>-1</sup>): 3393, 3303, 3079, 2966, 2875, 1731, 1648, 1545, 1445, 1370, 1218, 1179, 1157, 1096, 1026, 861, 756, 666; <sup>1</sup>H NMR (CDCl<sub>3</sub>, 400 MHz) δ: 4.24 (q, *J* = 7.2 Hz, 4H), 3.91–3.86 (m, 2H), 2.54 (t, *J* = 7.2 Hz, 2H), 2.48–2.43 (m, 2H), 1.71 (q, *J* = 7.4 Hz, 2H), 1.29 (t, *J* = 7.2 Hz, 6H), 0.96 (t, *J* = 7.4 Hz, 3H); <sup>13</sup>C NMR (CDCl<sub>3</sub>, 100 MHz) δ: 171.1, 168.6, 71.5, 61.7, 58.9, 35.1, 33.6, 33.3, 28.4, 19.6, 13.9, 13.8, 13.7, MS (ESI): *m/z* = 256 [M + H]<sup>+</sup>; HRMS calculated for [C<sub>13</sub>H<sub>21</sub>NO<sub>4</sub> + H]<sup>+</sup>: 256.1549, found 256.1551.

### 8.4. Diethyl 3,4-dihydro-5-*tert*-butyl-2H-pyrrole-4,4-dicarboxylate (21d)

M.F.: C<sub>14</sub>H<sub>23</sub>NO<sub>4</sub>, Mol. Wt: 269.34

IR (neat, cm<sup>-1</sup>): 3445.84, 2981.42, 2871.32, 1731.88, 1622.02, 1481.34, 1463.83, 1393.26, 1365.44, 1304.88, 1260.48, 1177.68, 1084.71, 1025.92, 999.27, 963.15, 864.89 and 772.29. <sup>1</sup>H NMR (CDCl<sub>3</sub>, 400 MHz) δ: 4.24 (q, *J* = 7.2 Hz, 4H), 3.85 (t, *J* = 6.6

Hz, 2H), 2.59 (t,  $J = 6.8$  Hz, 2H), 1.30 (t,  $J = 7.0$  Hz, 3H), 1.28 (t,  $J = 6.8$  Hz, 6H), 1.25 (s, 9H);  $^{13}\text{C}$  NMR ( $\text{CDCl}_3$ , 50 MHz)  $\delta$ : 178.5, 169.3, 70.0, 61.7, 58.1, 37.9, 37.7, 29.6, 13.8; MS (ESI):  $m/z = 270$  [ $\text{M} + \text{H}$ ] $^+$ ; HRMS calculated for [ $\text{C}_{14}\text{H}_{23}\text{NO}_4 + \text{H}$ ] $^+$ : 270.1705, found 270.1703.

### 8.5. Diethyl 3,4-dihydro-5-phenyl-2H-pyrrole-4,4-dicarboxylate (21e)

M.F.:  $\text{C}_{16}\text{H}_{19}\text{NO}_4$ , Mol. Wt: 289.33

IR (neat,  $\text{cm}^{-1}$ ): 3419, 2981, 1732, 1446, 1261, 1178, 1085, 1018, 759, 694;  $^1\text{H}$  NMR ( $\text{CDCl}_3$ , 400 MHz)  $\delta$ : 7.87–7.85 (m, 2H), 7.39–7.32 (m, 3H), 4.23–4.15 (m, 4H), 4.10 (t,  $J = 6.8$  Hz, 2H), 2.77 (t,  $J = 6.8$  Hz, 2H), 1.16 (t,  $J = 7.0$  Hz, 6H);  $^{13}\text{C}$  NMR ( $\text{CDCl}_3$ , 50 MHz)  $\delta$ : 169.0, 167.9, 133.1, 130.1, 128.6, 127.8, 70.0, 62.0, 59.1, 37.0, 13.7; MS (ESI):  $m/z = 290$  [ $\text{M} + \text{H}$ ] $^+$ ; HRMS calculated for [ $\text{C}_{16}\text{H}_{19}\text{NO}_4 + \text{H}$ ] $^+$ : 290.1392, found 290.1396.

### 8.6. Diethyl 5-(3-chlorophenyl)-3,4-dihydro-2H-pyrrole-4,4-dicarboxylate (21f)

Mol. Wt:  $\text{C}_{16}\text{H}_{18}\text{ClNO}_4$ , Mol. Wt: 323.77

IR (neat,  $\text{cm}^{-1}$ ): 3325, 3066, 2981, 1730, 1645, 1541, 1473, 1369, 1265, 1178, 1024, 858, 806, 752, 682;  $^1\text{H}$  NMR ( $\text{CDCl}_3$ , 400 MHz)  $\delta$ : 7.9 (t, 1H,  $J = 1.8$ ), 7.75 (dt,  $J = 1.6$ ,  $J = 7.6$ , 1H), 7.38–7.36 (m, 1H), 7.28 (m, 1H), 4.22 (m, 4H), 4.1 (t,  $J = 7.2$  Hz, 2H), 2.77 (t,  $J = 7.0$  Hz, 2H), 1.20 (t,  $J = 7.2$  Hz, 6H);  $^{13}\text{C}$  NMR ( $\text{CDCl}_3$ , 50 MHz)  $\delta$ : 168.7, 166.8, 146.3, 134.9, 133.9, 130.1, 129.0, 128.8, 126.8, 166.1, 70.1, 62.2, 59.1, 36.9, 30.1, 21.4, 13.8; MS (ESI):  $m/z = 324/326$  [ $\text{M} + \text{H}$ ] $^+$ ; HRMS calculated for [ $\text{C}_{16}\text{H}_{18}\text{ClNO}_4 + \text{H}$ ] $^+$ : 324.1003, found 324.0992.

### 8.7. Diethyl 3,4-dihydro-5-(4-fluorophenyl)-2H-pyrrole-4,4-dicarboxylate (21g)

M.F.:  $\text{C}_{16}\text{H}_{18}\text{FNO}_4$ , Mol. Wt: 307.32

IR (neat,  $\text{cm}^{-1}$ ): 3450, 3073, 2983, 2869, 1732, 1602, 1590, 1510, 1446, 1390, 1367, 1261, 1179, 1085, 1014, 846, 813, 758, 590;  $^1\text{H}$  NMR ( $\text{CDCl}_3$ , 400 MHz)  $\delta$ : 7.90 (m, 2H), 7.07–7.01 (m, Hz, 2H), 4.24–4.17 (m, 4H), 4.09 (t,  $J = 6.8$  Hz, 2H), 2.77 (t,  $J = 6.8$  Hz, 2H), 1.18 (t,  $J = 7.2$  Hz, 6H);  $^{13}\text{C}$  NMR ( $\text{CDCl}_3$ , 100 MHz)  $\delta$ : 169.3, 167.1 & 166.3, 162.1, 130.3 & 130.2, 129.2 & 129.1, 115.6 & 115.2, 61.7, 50.0, 38.0, 28.0, 13.9; MS (ESI):  $m/z = 308$  [ $\text{M} + \text{H}$ ] $^+$ ; HRMS calculated for [ $\text{C}_{16}\text{H}_{18}\text{FNO}_4 + \text{H}$ ] $^+$ : 308.1298, found 308.1305.

### 8.8. Diethyl 3,4-dihydro-5-(4-nitrophenyl)-2H-pyrrole-4,4-dicarboxylate (21h)

M.F.: C<sub>16</sub>H<sub>18</sub>N<sub>2</sub>O<sub>6</sub>, Mol. Wt: 334.32

IR (neat, cm<sup>-1</sup>): 3437, 3075, 2983, 2866, 1753, 1597, 1517, 1342, 1318, 1262, 1176, 1081, 1024, 854, 742, 690; <sup>1</sup>H NMR (CDCl<sub>3</sub>, 400 MHz) δ: 8.22 (d, *J* = 8.8 Hz, 2H), 8.07 (d, *J* = 8.8 Hz, 2H), 4.25–4.21 (m, 6H), 2.80 (t, *J* = 6.8 Hz, 2H), 1.20 (t, *J* = 7.0 Hz, 6H); <sup>13</sup>C NMR (CDCl<sub>3</sub>, 50 MHz) δ: 168.6, 166.3, 148.62, 139.1, 129.7, 123.0, 70.2, 62.4, 59.6, 36.8, 13.9; MS (ESI): *m/z* = 335 [M + H]<sup>+</sup>; HRMS calculated for [C<sub>16</sub>H<sub>18</sub>N<sub>2</sub>O<sub>6</sub> + H]<sup>+</sup> 335.1243, found 335.1251.

### 8.9. Diethyl 3,4-dihydro-5-(3-methoxyphenyl)-2H-pyrrole-4,4-dicarboxylate (21i)

M.F.: C<sub>17</sub>H<sub>21</sub>NO<sub>5</sub>, Mol. Wt: 319.35

IR (neat, cm<sup>-1</sup>): 3448, 3076, 2981, 2939, 2837, 1729, 1600, 1579, 1488, 1464, 1366, 1320, 1262, 1178, 1085, 1020, 863, 789, 693; <sup>1</sup>H NMR (CDCl<sub>3</sub>, 400 MHz) δ: 7.48 (s, 1H), 7.39 (d, *J* = 8.0 Hz, 1H), 7.25 (d, *J* = 8.4 Hz, 1H), 6.96 (dd, *J* = 2.2 Hz, *J* = 8.0 Hz, 1H), 4.29–4.23 (m, 4H), 4.10 (t, *J* = 6.8 Hz, 2H), 3.82 (s, 3H), 2.77 (t, *J* = 6.4 Hz, 2H), 1.18 (t, *J* = 7.2 Hz, 6H); <sup>13</sup>C NMR (CDCl<sub>3</sub>, 100 MHz) δ: 169.3, 167.2, 159.6, 135.6, 129.4, 118.5, 117.7, 112.0, 61.6, 55.3, 50.0, 38.0, 28.1, 13.9; MS (ESI): *m/z* = 320 [M + H]<sup>+</sup>; HRMS calculated for [C<sub>17</sub>H<sub>21</sub>NO<sub>5</sub> + H]<sup>+</sup> 320.1498, found 320.1491.

### 8.10. Diethyl 3,4-dihydro-5-(thiophen-2-yl)-2H-pyrrole-4,4-dicarboxylate (21j)

M.F.: C<sub>14</sub>H<sub>17</sub>NO<sub>4</sub>S, Mol. Wt: 295.35

IR (neat, cm<sup>-1</sup>): 3453, 3105, 2982, 1731, 1601, 1429, 1316, 1262, 1180, 1085, 1005, 848, 754; <sup>1</sup>H NMR (400 MHz, CDCl<sub>3</sub>) δ: 7.45 (dd, *J* = 1.0 Hz, *J* = 4.2 Hz, 1H), 7.38 (dd, *J* = 1.0 Hz, *J* = 3.8 Hz, 1H), 7.01 (dd, *J* = 3.6 Hz, 5.2 Hz, 1H), 4.28–4.16 (m, 4H), 4.19 (t, *J* = 3.4 Hz, 2H), 2.77 (t, *J* = 6.4 Hz, 2H), 1.21 (t, *J* = 7.0 Hz, 6H); <sup>13</sup>C NMR (50 MHz, CDCl<sub>3</sub>) δ: 168.6, 162.2, 137.4, 130.2, 129.1, 127.2, 70.4, 62.1, 59.2, 36.5, 13.8; MS (ESI): *m/z* = 296 [M + H]<sup>+</sup>; HRMS calculated for [C<sub>14</sub>H<sub>17</sub>NO<sub>4</sub>S + H]<sup>+</sup> 296.0957, found 296.0963.

## 9. Spectral data of 23, 24, 28, 29, 31 and 32

### 9.1. 5-phenyl-3,4-dihydro-2H-pyrrole (23)

M.F.: C<sub>10</sub>H<sub>11</sub>N, Mol. Wt: 145.09

IR (neat, cm<sup>-1</sup>): 3390, 3057, 2960, 2860, 1616, 1573, 1494, 1446, 1340, 1311, 1178, 1076, 1047, 1026, 988, 966, 921; <sup>1</sup>H NMR (CDCl<sub>3</sub>, 400 MHz) δ: 7.85–7.82 (m, 2H), 7.42–7.36 (m, 3H), 4.07–4.03 (m, 2H), 2.96–2.91 (m, 2H), 2.06–1.98 (m, 2H); <sup>13</sup>C NMR (CDCl<sub>3</sub>, 100 MHz) δ: 173.1, 134.5, 130.1, 128.2, 127.4, 61.3, 34.8, 22.5; MS (ESI): *m/z* = 146.1 [M + H]<sup>+</sup>; HRMS calculated for [C<sub>10</sub>H<sub>11</sub>N + H]<sup>+</sup>:146.0970, found 146.0972.

### 9.2. Ethyl 5-phenyl-3,4-dihydro-2H-pyrrole-4-carboxylate (24)

M.F.: C<sub>13</sub>H<sub>15</sub>NO<sub>2</sub>, Mol. Wt: 217.26

IR (CHCl<sub>3</sub>, cm<sup>-1</sup>): 2980, 1730, 1617, 1446, 1368, 1327, 1254, 1219, 1157, 1044; <sup>1</sup>H NMR (CDCl<sub>3</sub>, 400 MHz) δ: 7.87–7.85 (dd, *J* = 1.8 Hz, *J* = 2H), 7.42–7.38 (m, 3H), 4.20–4.06 (m, 5H), 2.38–2.32 (m, 2H), 1.14 (t, *J* = 7.0); <sup>13</sup>C NMR (CDCl<sub>3</sub>, 100 MHz) δ: 171.9, 169.1, 133.1, 130.3, 128.2, 127.6, 60.85, 60.81, 53.3, 29.47, 29.42, 29.1, 29.05, 13.8, 13.7; MS (ESI): *m/z* = 218.2 [M + H]<sup>+</sup>; HRMS calculated for [C<sub>13</sub>H<sub>15</sub>NO<sub>2</sub> + H]<sup>+</sup>:218.1181, found 218.1180.

### 9.3. Ethyl 3-(aziridin-1-yl)-2-cyano-3-phenylacrylate (28)

M.F.: C<sub>14</sub>H<sub>14</sub>N<sub>2</sub>O<sub>2</sub>, Mol. Wt: 242.27

IR (neat, cm<sup>-1</sup>): 3019, 2401, 2215, 1712, 1581, 1538, 1488, 1473, 1403, 1283, 1249, 1216, 1174, 1135, 1108, 1062, 1038, 1018, 850; <sup>1</sup>H NMR (CDCl<sub>3</sub>, 400 MHz) δ: 7.56–7.2 (m, 5H), 4.29 and 4.09 (q, *J* = 7.0 Hz and q, *J* = 7.2 Hz, 2H), 2.48 and 2.44 (s, s, 4H), 1.37 and 1.17 (t, *J* = 7.0 Hz and t, *J* = 7.2 Hz, 3H); <sup>13</sup>C NMR (CDCl<sub>3</sub>, 100 MHz) δ: 176.8 and 176.0, 162.68, 136.1 and 135.8, 130.67 and 130.0, 128.6 and 128.1, 127.4 and 127.1, 117.88 and 117.24, 87.8, 87.6, 61.0 and 60.9, 32.7 and 30.0, 14.2 and 13.9; MS (ESI): *m/z* = 243.1 [M + H]<sup>+</sup>.

### 9.4. Ethyl 4-cyano-5-phenyl-3,4-dihydro-2H-pyrrole-4-carboxylate (29)

M.F.: C<sub>14</sub>H<sub>14</sub>N<sub>2</sub>O<sub>2</sub>, Mol. Wt: 242.27

IR (neat, cm<sup>-1</sup>): 2983, 2937, 2869, 2244, 2210, 1742, 1667, 1626, 1577, 1496, 1368, 1320, 1252, 1195, 1097, 1073, 1008, 854, 779, 693; <sup>1</sup>H NMR (CDCl<sub>3</sub>, 400 MHz) δ: 7.93 (d, *J* = 7.6 Hz, 2H), 7.52–7.42 (m, 3H), 4.35–4.22 (m, 4H), 2.82–2.78 (m, 2H), 1.25–1.21

(m, 3H) ;  $^{13}\text{C}$  NMR ( $\text{CDCl}_3$ , 100 MHz)  $\delta$ : 166.6, 163.4, 131.3, 129.0, 128.6, 127.8, 116.9, 63.4, 60.4, 56.3, 37.9, 13.6; MS (ESI):  $m/z = 243.2$  [ $\text{M} + \text{H}$ ] $^+$ ; HRMS calculated for [ $\text{C}_{14}\text{H}_{14}\text{N}_2\text{O}_2 + \text{H}$ ] $^+$ : 243.1134, found 243.1133.

### 9.5. 2-Butylaziridine (30)

IR (neat,  $\text{cm}^{-1}$ ): 2922, 2851, 1595, 1464, 1219, 772 ;  $^1\text{H}$  NMR ( $\text{CDCl}_3$ , 400 MHz)  $\delta$ : 1.94–1.91 (m, 1H), 1.75 (d,  $J = 5.6$  Hz), 1.48–1.32 (m, 7H), 0.91 (t,  $J = 7.0$  Hz, 3H)  $^{13}\text{C}$  NMR ( $\text{CDCl}_3$ , 100 MHz)  $\delta$ : 34.0, 30.3, 29.6, 25.0, 22.4, 13.9; MS (ESI):  $m/z = 100.1$  [ $\text{M} + \text{H}$ ] $^+$ , 199.1 [ $2\text{M} + \text{H}$ ] $^+$ .

### 9.6. Diethyl 2-[(2-butylaziridin-1-yl)phenylmethylene]malonate (31)

M.F.:  $\text{C}_{20}\text{H}_{27}\text{NO}_4$ , Mol. Wt: 345.43

IR (neat,  $\text{cm}^{-1}$ ): 3020, 2961, 2933, 2400, 1709, 1605, 1584, 1570, 1491, 1445, 1412, 1369, 1337, 1276, 1215, 1155, 1080, 1026, 928, 851;  $^1\text{H}$  NMR ( $\text{CDCl}_3$ , 400 MHz)  $\delta$ : 7.36–7.29 (m, 5H), 4.33–4.24 (m, 2H), 3.88–3.94 (m, 2H), 2.28–2.27 (d,  $J = 3.2$  Hz, 1H), 2.20–2.15 (m, 2H), 1.62–1.57 (m, 2H), 1.33 (t,  $J = 7.2$  Hz, 3H), 1.19–1.08 (m, 4H), 0.93 (t,  $J = 7.0$  Hz, 3H), 0.79 (t,  $J = 3.2$  Hz, 3H) ;  $^{13}\text{C}$  NMR ( $\text{CDCl}_3$ , 100 MHz)  $\delta$ : 166.0, 166.9, 164.5, 137.5, 128.7, 127.9, 127.5, 110.2, 60.6 and 60.5, 41.6, 37.8, 32.0, 28.3, 22.2, 14.2, 13.8, 13.6; MS (ESI):  $m/z = 346.2$  [ $\text{M} + \text{H}$ ] $^+$ .

### 9.7. Diethyl 2-butyl-3,4-dihydro-5-phenyl-2H-pyrrole-4,4-dicarboxylate (32)

M.F.:  $\text{C}_{20}\text{H}_{27}\text{NO}_4$ , Mol. Wt: 345.43

IR ( $\text{CHCl}_3$ ,  $\text{cm}^{-1}$ ): 2932, 1730, 1606.3, 1446, 1367, 1258, 1219, 1184, 1126, 1096, 1061;  $^1\text{H}$  NMR ( $\text{CDCl}_3$ , 400 MHz)  $\delta$ : 7.87–7.84 (m, 2H), 7.39–7.31 (m, 3H), 4.24–4.13 (m, 5H), 2.96–2.91 (dd,  $J = 6.8$  Hz,  $J = 13.6$  Hz, 1H); 2.32–2.26 (dd,  $J = 7.8$  Hz,  $J = 13.0$  Hz, 1H), 1.89–1.84 (m, 1H), 1.56–1.37 (m, 5H), 1.19 (t,  $J = 7.2$  Hz, 3H), 1.13 (t,  $J = 7.2$  Hz, 3H), 0.94 (t,  $J = 7.2$  Hz, 3H);  $^{13}\text{C}$  NMR ( $\text{CDCl}_3$ , 100 MHz)  $\delta$ : 169.7, 168.8, 166.3, 133.3, 130.0, 128.7, 127.8, 70.9, 70.6, 62.0, 61.9, 42.4, 35.6, 28.9, 22.7, 14.0, 13.8, 13.7; MS (ESI):  $m/z = 346.2$  [ $\text{M} + \text{H}$ ] $^+$ ; HRMS calculated for [ $\text{C}_{20}\text{H}_{27}\text{NO}_4 + \text{H}$ ] $^+$ : 346.2018, found 346.2006.



## 10. References

1. Rathke, M. W.; Cowan P. J. *J. Org. Chem.* **1985**, *50*, 2622.  
doi:10.1021/jo00215a003
2. Jung, J. C.; Watkins, E. B.; Avery, M. A. *Synth. Commun.* **2002**, *24*, 3767 – 3778 doi:  
10.1081/SCC-120015395
3. Bankowska, Z.; Zadrozna, I.; Bochenska, J. *Polish Journal of Chemistry*; **1980**, *54*,  
461 – 467.
4. Brown, E. J. D.; Harley-Mason, J. *J. Chem. Soc. [Section] C: Organic* **1966**, 1390-  
1394.
5. Hormi, O. *Org. Synth.* **1993**, *coll. vol. 8*, 247-250.
6. Viehe, H. G. *Angewandte Chemie.* 1971, *83*, 616 – 617.  
doi: 10.1002/ange.19710831606
7. Hormi, Osmo E. O. *Synth. Commun.* **1986**, *16*, 997-1002
8. Rappoport, Z.; Topol, A. *J. Chem. Soc., Perkin Transactions 2: Physical Organic  
Chemistry (1972-1999)*; **1975**, 863 – 874.
9. Goorge, A. D.; Mary, D.; Mary C. C. Pyrazolo-‘3,4-B! Compounds And Their Use As  
Phosphodiesterase Type 4 (PDE4) Inhibitors. WO Patent 2005/090348, September  
29, 2005.
10. Stavinoha, J. L.; Mariano, P. S. *J. Am. Chem. Soc.* **1981**, *103*, 3136-3148.
11. Kumar, K. A.; Rai, L., K. M.; Umesha, K. B. *Tetrahedron* **2001**, *57*, 6993-6996,  
doi:10.1016/S0040-4020(01)00612-3
12. Tsuge, O.; Kanemasa, S.; Matsuda, K. *J. Org. Chem.* **1986**, *51*, 1997-2004
13. Jalander, L. F. *Synth. Commun.* **1993**, *23*, 2293-2302.
14. Kolb, H. C.; Kanamarlapudi, R. C.; Richardson, P. F.; Khan, G. Large Scale  
Synthesis Of Optically Pure Aziridines. US Patent 0153771 A1, August 14, 2003.

## 12. Spectra of 2-[(aziridin-1-yl)-1-alkyl/aryl/heteroaryl-methylene]malonic acid diethyl esters (*N*-vinyl aziridines) - 20a, 20c, 20d, 20f–20h

### <sup>1</sup>H NMR spectrum of 20a

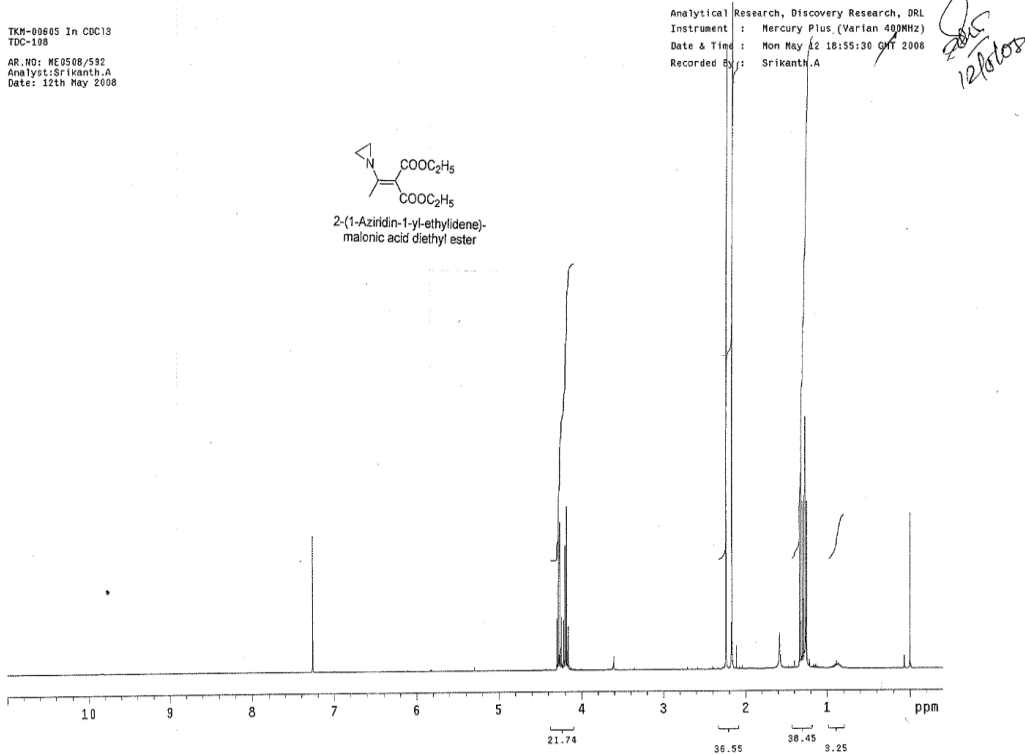

### <sup>13</sup>C NMR spectrum of 20a

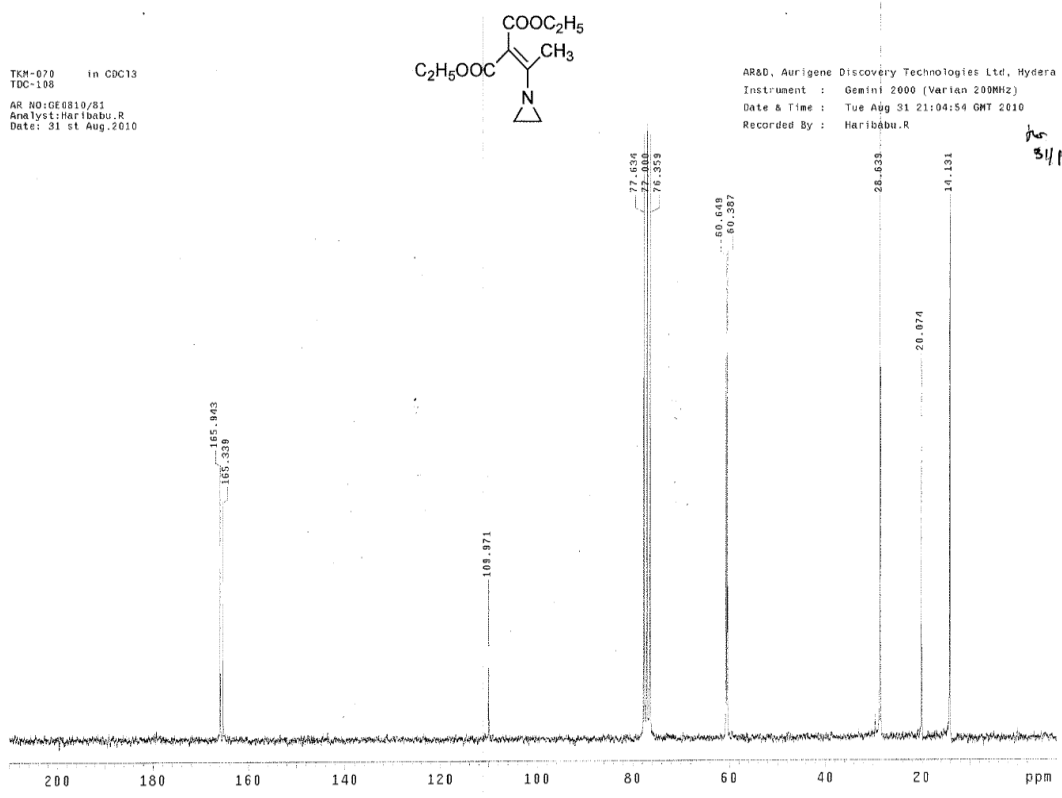

# Mass spectrum of 20a

CPS,MIYAPUR

## Mass Analysis Report

DA.R.E.DDY'S

|                        |              |                               |         |
|------------------------|--------------|-------------------------------|---------|
| <b>Data Filename</b>   | 080604014.d  | <b>Sample Name</b>            |         |
| <b>Sample Type</b>     | Sample       | <b>Position</b>               | Vial 31 |
| <b>Instrument Name</b> | Instrument 1 | <b>User Name</b>              |         |
| <b>Acq Method</b>      |              | <b>IRM Calibration Status</b> | Success |
| <b>DA Method</b>       | DA.m         | <b>Comment</b>                |         |

### User Spectra

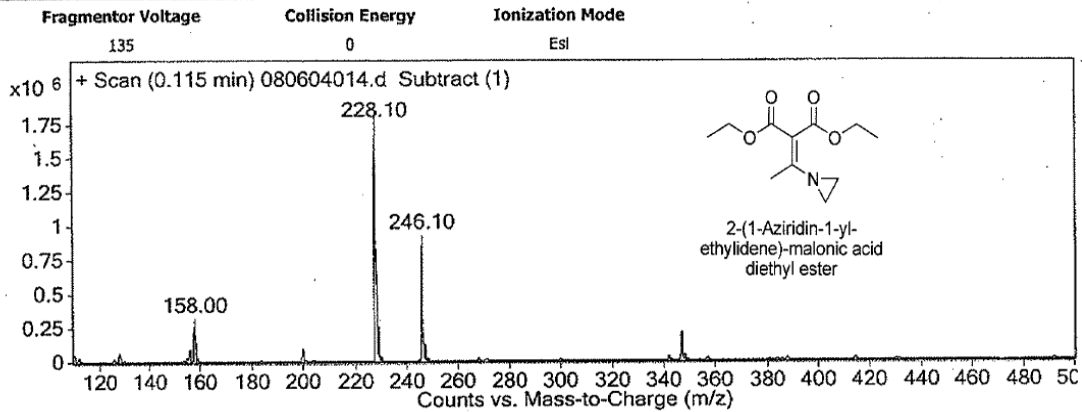

--- End Of Report ---

# IR spectrum of 20a

software version: Report Builder, Rev. 2.01

CUSTOM PHARMACEUTICAL SERVICES

date: 3/9/2011

time: 3:10:47 PM

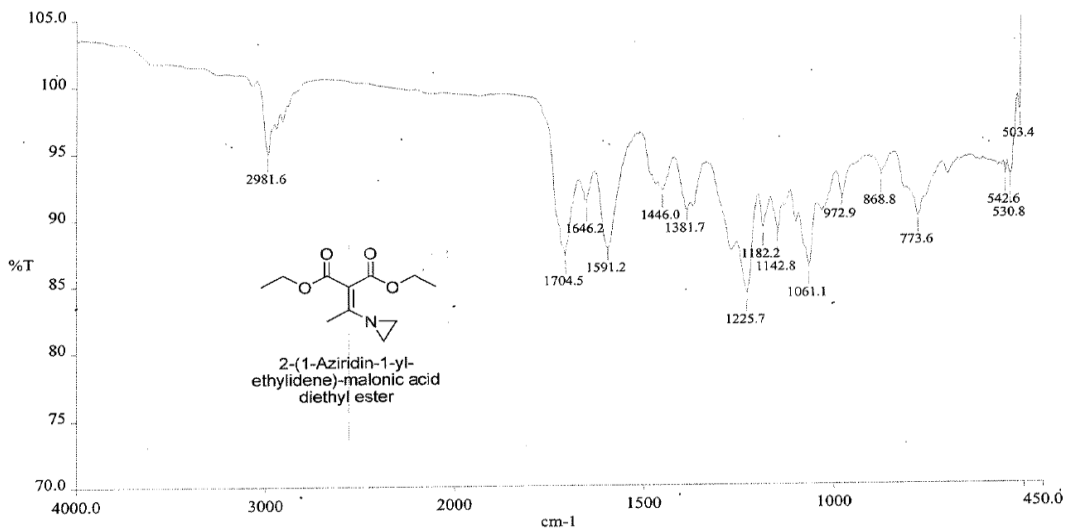

TKM-70..002

spectrum pathname: C:\pel\_data\spectra\TKM-70..002

date created: wed mar 09 15:09:06 2011

09/03/11

# <sup>1</sup>H NMR spectrum of 20c

TKM-03109 IN CDCl<sub>3</sub>  
TDC-108  
AR.No:ME0908/1835  
Analyst:Srikanth.A  
Date:30th September 2008

Analytical Research, Discovery Research, DRL  
Instrument : Mercury Plus (Varian 400MHz)  
Date & Time : Tue Sep 30 17:33:31 IST 2008  
Recorded By : Srikanth.A

*S.S.*  
*30/9/08*

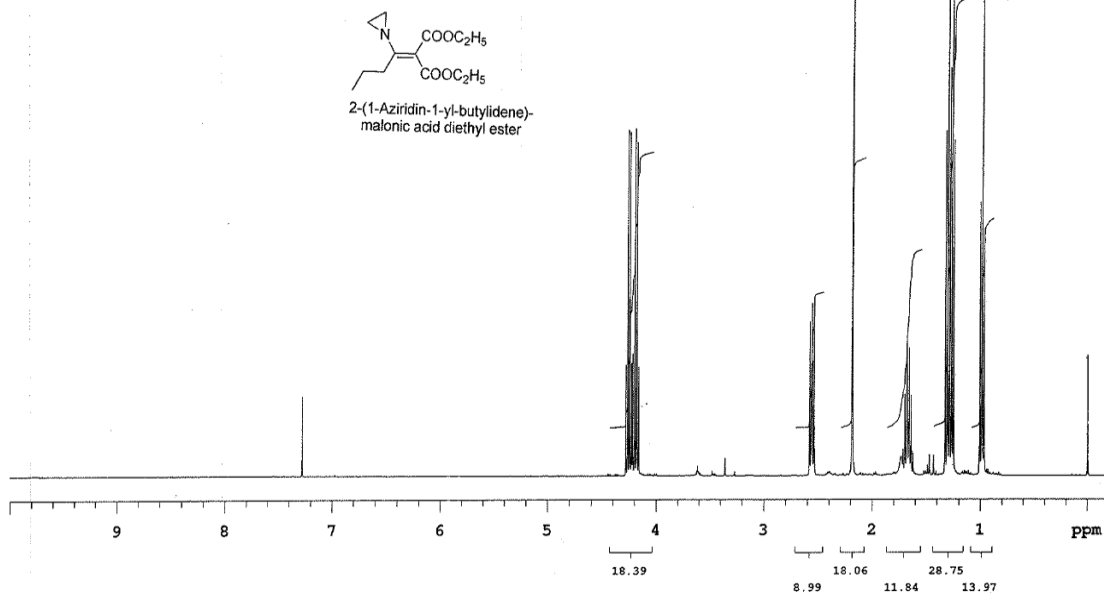

# <sup>13</sup>C NMR spectrum of 20c

TKM-03109 IN CDCl<sub>3</sub>  
TDC-108  
AR.No: GE1008/027  
Analyst: Seshu  
Date:14th October 2008.

Analytical Research, Discovery Research, DRL  
Instrument : Gemini 2000 (Varian 200MHz)  
Date & Time : Tue Oct 14 10:47:16 GMT 2008  
Recorded By : Shruthi.D

*T.Seshu*  
*14/10/08*

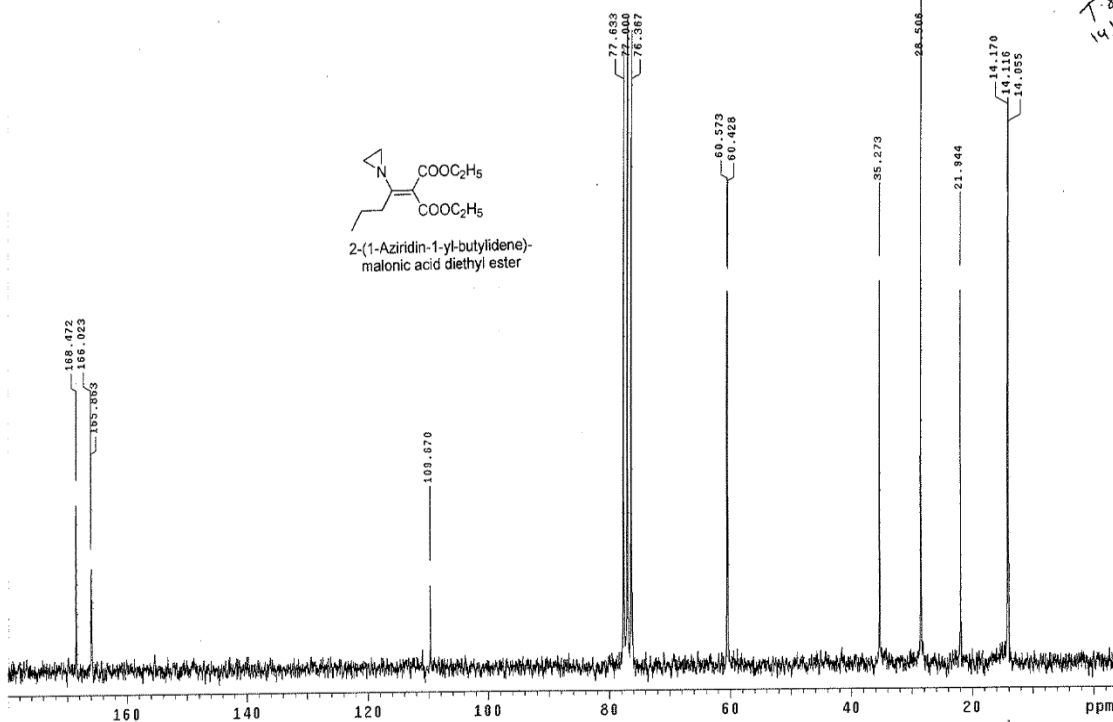

# Mass spectrum of 20c

CPS,MIYAPUR

## Mass Analysis Report

DR. REDDY'S

|                        |              |                               |           |
|------------------------|--------------|-------------------------------|-----------|
| <b>Data Filename</b>   | 081001016.d  | <b>Sample Name</b>            | TKM-03109 |
| <b>Sample Type</b>     | Sample       | <b>Position</b>               | Vial 53   |
| <b>Instrument Name</b> | Instrument 1 | <b>User Name</b>              |           |
| <b>Acq Method</b>      |              | <b>IRM Calibration Status</b> | Success   |
| <b>DA Method</b>       | DA.m         | <b>Comment</b>                |           |

### User Spectra

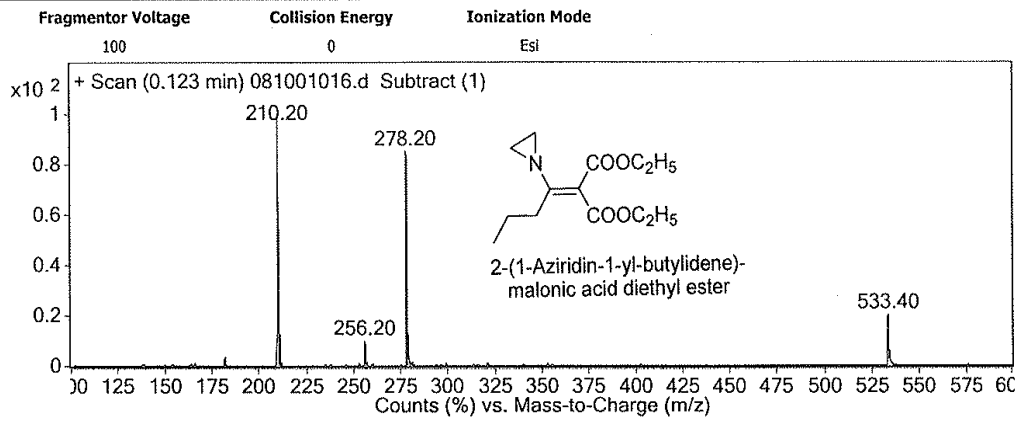

--- End Of Report ---

# IR spectrum of 20c

DR. REDDY'S LABORATORIES LIMITED

Date: 9/30/08

TDC/CCS-ANALYTICAL RESEARCH.

Time: 3:34:24 PM

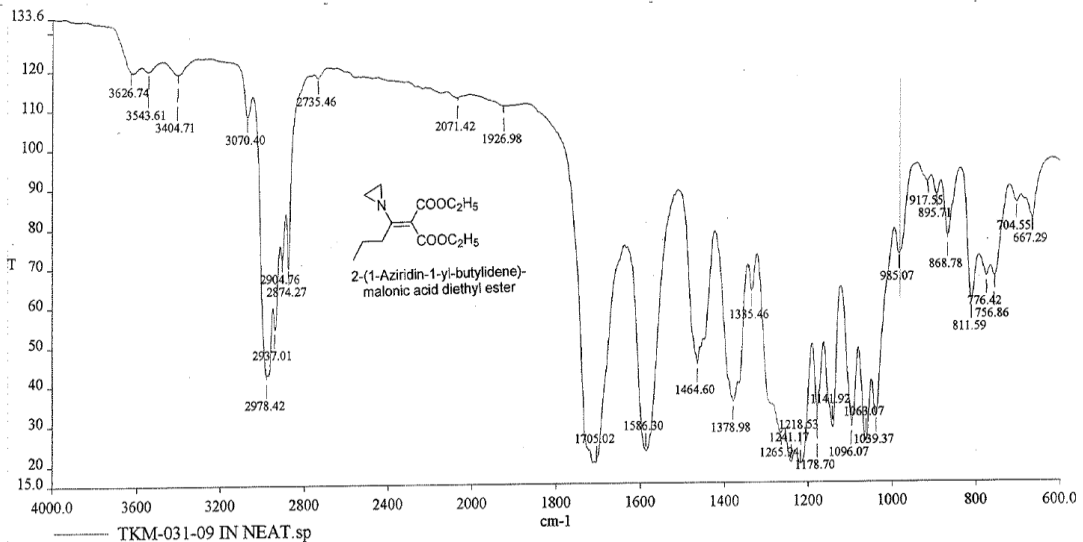

Analyst: APARNA

SIGN: *[Signature]*

30/09/08

AR008130 | SA-1116

# <sup>1</sup>H NMR spectrum of 20d

TKM/03710 IN CDCL3  
TDC-108

AR.No:ME1008/912  
Analyst:Seshu  
Date:21st October 2008  
\*\*\*shimming problem\*\*\*

Analytical Research, Discovery Research, DRL  
Instrument Mercury Plus (Varian 400MHz)  
Date & Time Tue Oct 21 16:26:49 IST 2008  
Recorded By Shruthi. D

*T. Seshu  
21/10/08*

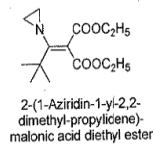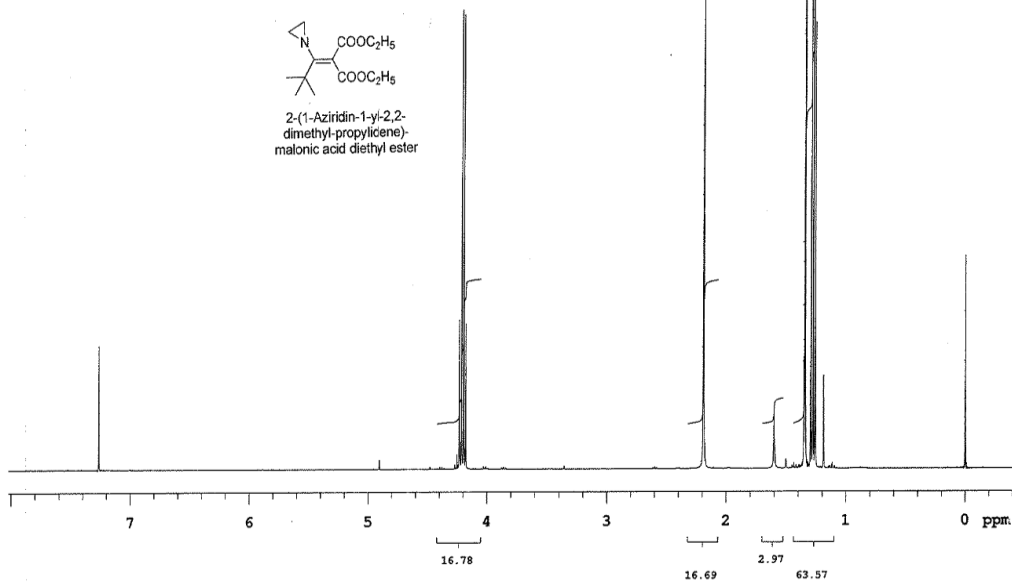

# <sup>13</sup>C NMR spectrum of 20d

TKM-03710 IN CDCL3  
TDC-108

AR.No: GE1008/050  
Analyst: Seshu  
Date:22nd October 2008.

Analytical Research, Discovery Research, DRL  
Instrument : Gemini 2000 (Varian 200MHz)  
Date & Time : Wed Oct 22 10:55:01 GMT 2008  
Recorded By : Shruthi.D

*T. Seshu  
22/10/08*

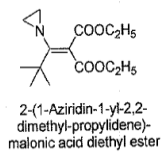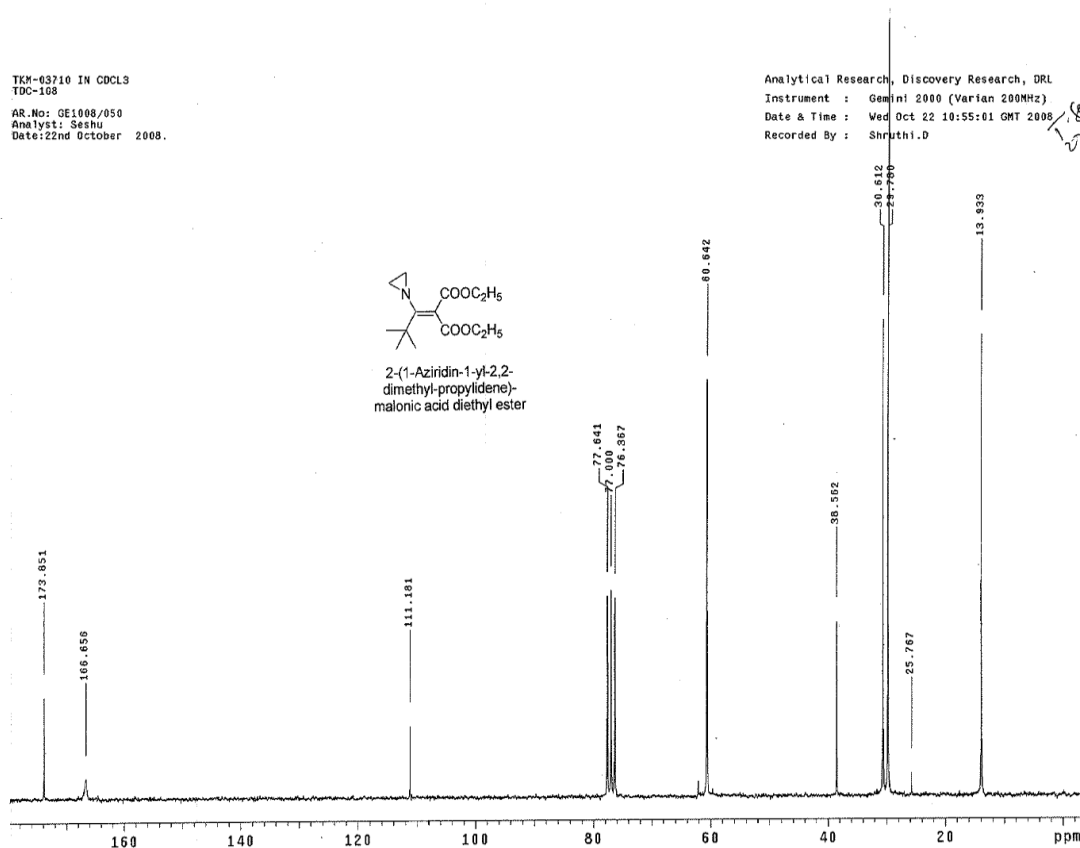

# Mass spectrum of 20d

CPS,MIYAPUR

## Mass Analysis Report

DR. REDDY'S

|                 |              |                        |           |
|-----------------|--------------|------------------------|-----------|
| Data Filename   | 081022007.d  | Sample Name            | TKM-03710 |
| Sample Type     | Sample       | Position               | Vial 7    |
| Instrument Name | Instrument 1 | User Name              |           |
| Acq Method      |              | IRM Calibration Status | Success   |
| DA Method       | DA.m         | Comment                |           |

### User Spectra

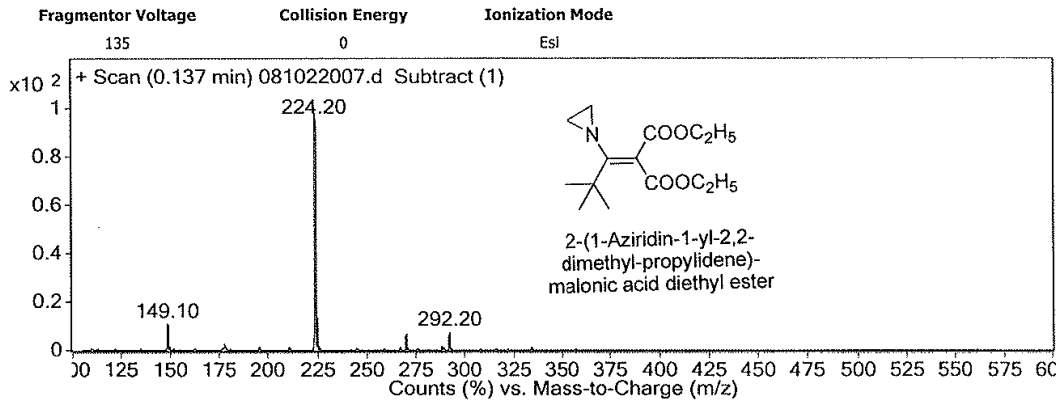

--- End Of Report ---

# IR spectrum of 20d

DR REDDY'S LABORATORIES LIMITED

Date: 10/21/08

TDC/CCS-ANALYTICAL RESEARCH.

Time: 3:08:40 PM

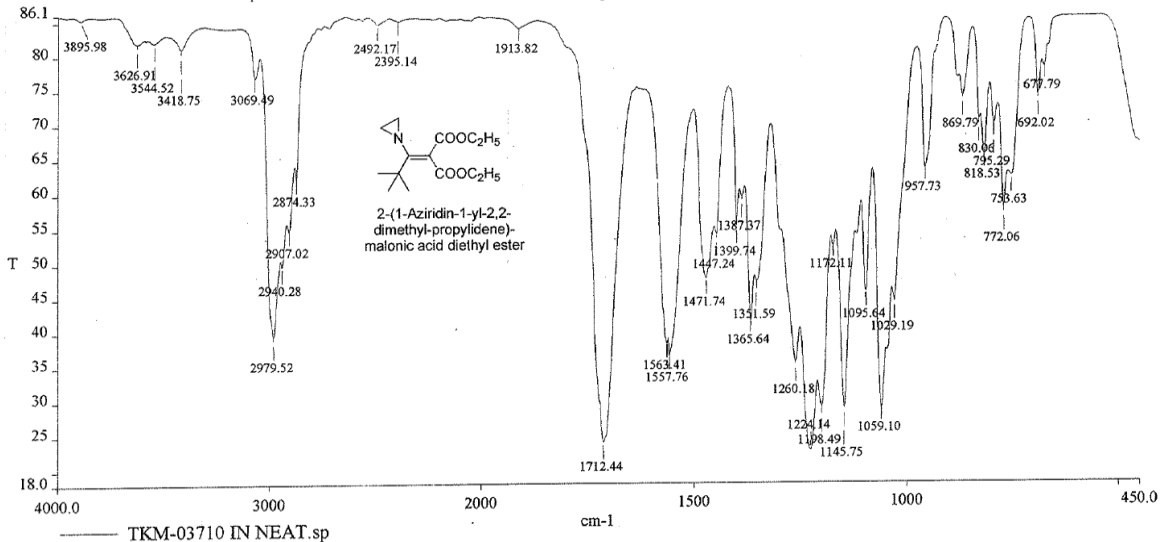

Analyst: SHYAM

SIGN: *[Signature]*

01/10/08  
mmnriatam1060

# <sup>1</sup>H NMR spectrum of 20f

TKM-02308 in CDCL3  
TDC-106  
AR.No: HE0005/1923  
Date: 26th August 2008.  
Analyst: Shruthi

Analytical Research, Discovery Research, DRL  
Instrument : Mercury Plus (Varian 400MHz)  
Date & Time : Wed Aug 26 13:50:16 IST 2008  
Recorded By : O.Shruthi

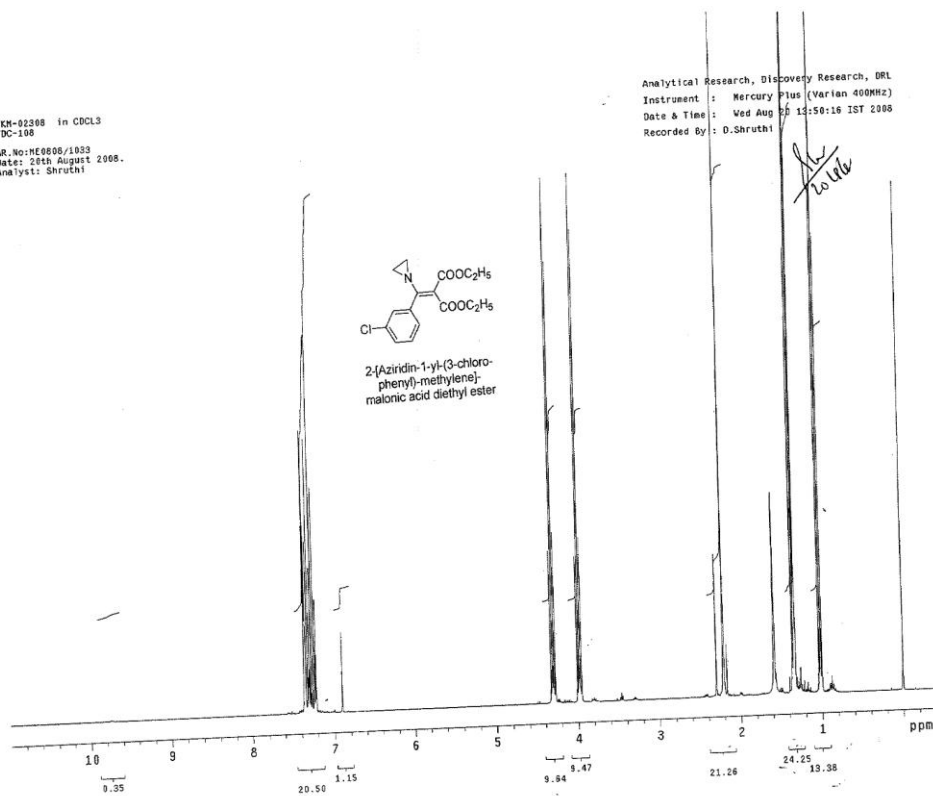

# <sup>13</sup>C NMR spectrum of 20f

TKM-02308 in CDCL3  
TDC-106  
AR.No: GE0008/069  
Analyst: Shruthi  
Date: 21st August 2008.

Analytical Research, Discovery Research, DRL  
Instrument : Gemini 2000 (Varian 200MHz)  
Date & Time : Thu Aug 21 14:05:12 GHT 2008  
Recorded By : Shruthi.D

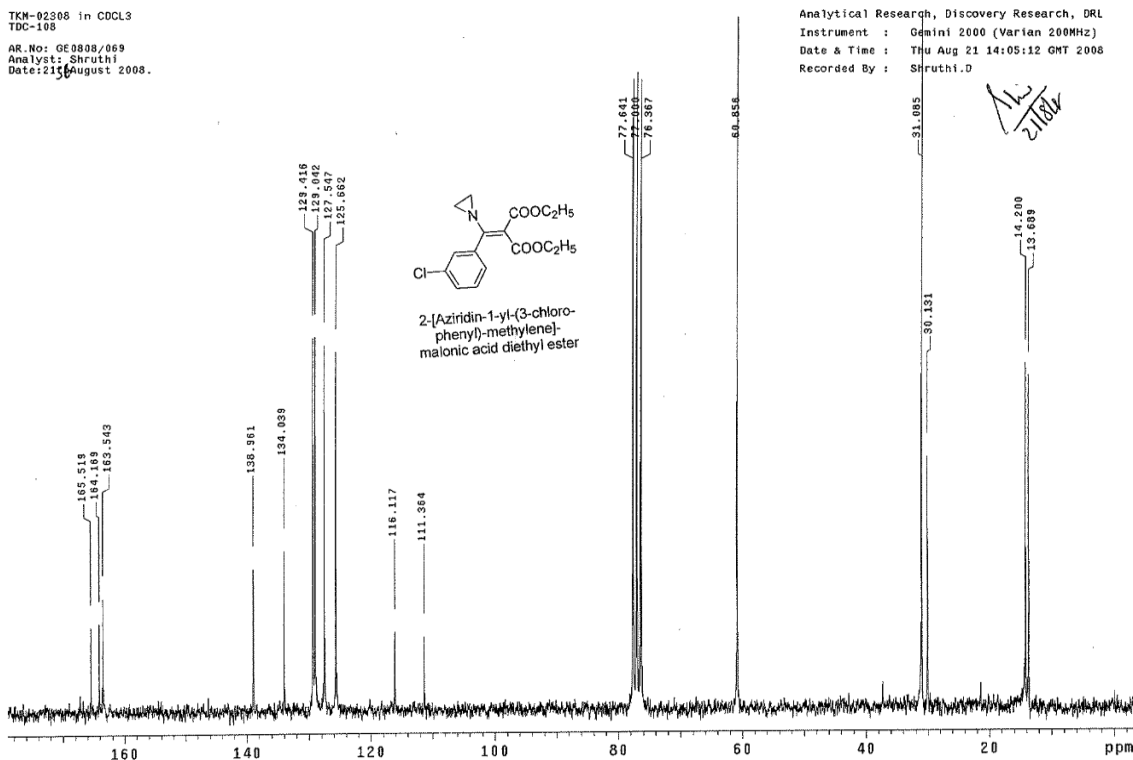



# Mass spectrum of 20f

CPS,MIYAPUR

## Mass Analysis Report

DR. REDDY'S

Data Filename 080821046.d  
Sample Type Sample  
Instrument Name Instrument 1  
Acq Method  
DA Method DA.m

Sample Name TKM-02308  
Position Vial 70  
User Name  
IRM Calibration Status Success  
Comment

### User Spectra

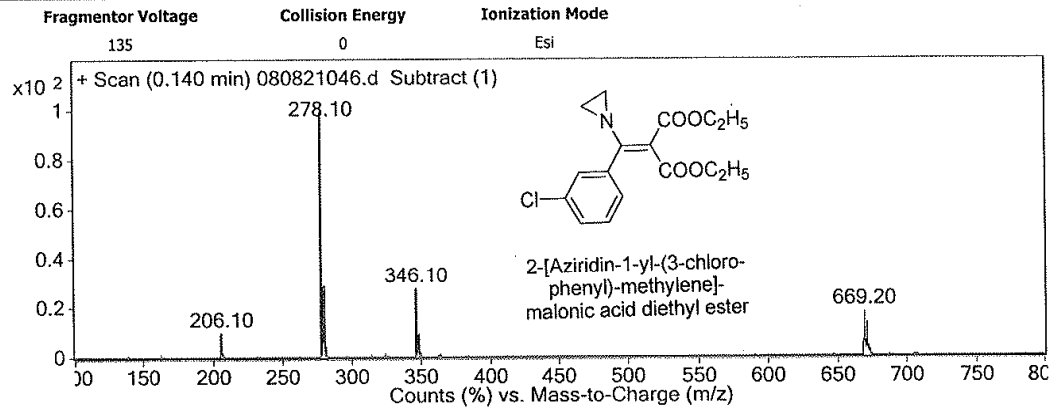

--- End Of Report ---

# IR spectrum of 20f

DR.REDDY'S LABORATORIES LIMITED

Date: 8/20/08

TDC/CCS-ANALYTICAL RESEARCH.

Time: 10:25:12 AM

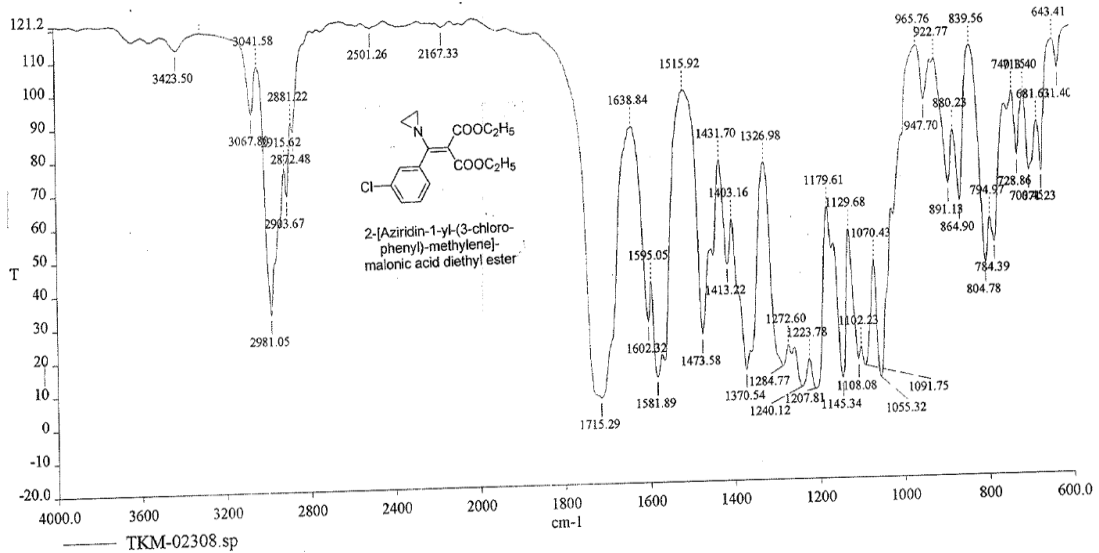

Analyst: SHYAM

SIGN: *[Signature]*

20/08/08

AR008130 (AM) 030

# <sup>1</sup>H NMR spectrum of 20g

TKM-050 in CDCl<sub>3</sub>  
TDC-108  
AR No: ME0209/455  
Analyst: Shruthi  
Date: 9th Feb 2009

Analytical Research, Discovery Research, DRL  
Instrument : Mercury Plus (Varian 400MHz)  
Date & Time : Mon Feb 9 11:37:21 IST 2009  
Recorded By : Shruthi, D

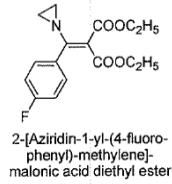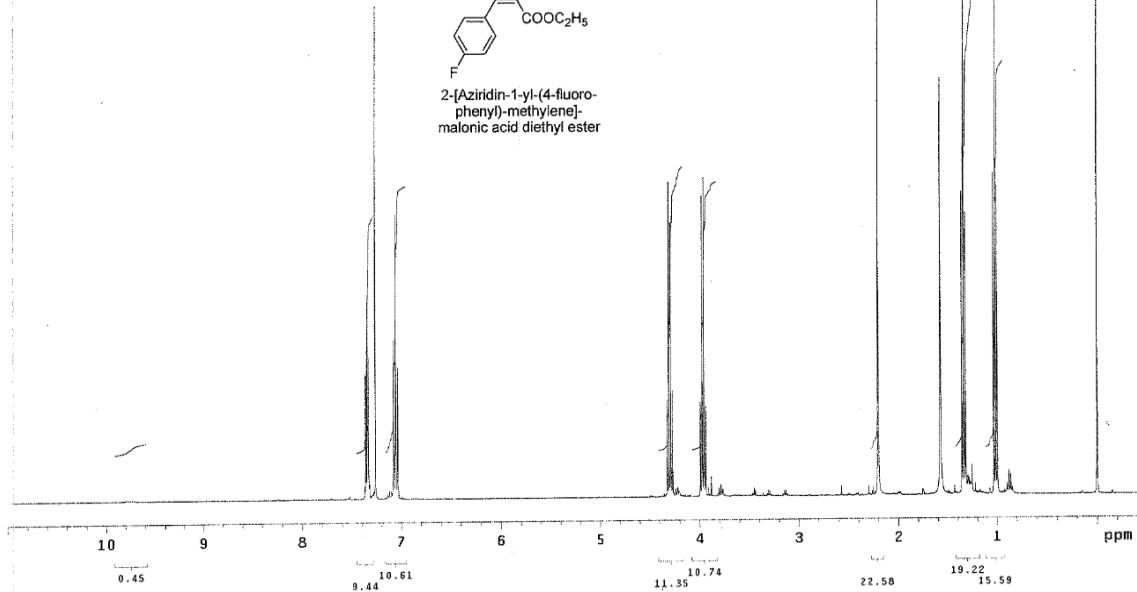

# <sup>13</sup>C NMR spectrum of 20g

TKM-050 in CDCl<sub>3</sub>  
TDC-108  
AR No: GE0209/40  
Analyst: Srikanth.A  
Date: 17th Feb 2009

Analytical Research, Discovery Research, DRL  
Instrument : Gemini 2000 (Varian 200MHz)  
Date & Time : Tue Feb 17 13:38:34 GMT 2009  
Recorded By : Shruthi, D

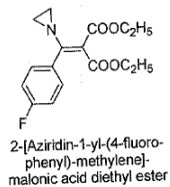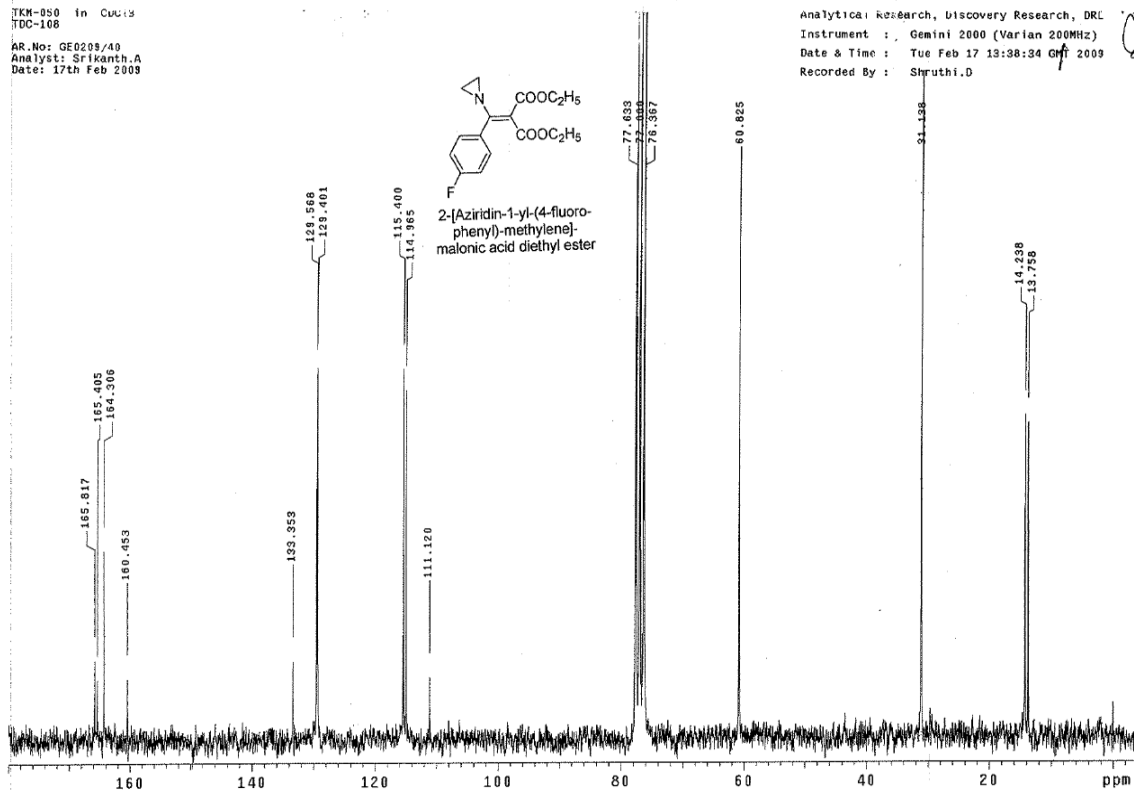

# Mass spectrum of 20g

CPS,MIYAPUR

## Mass Analysis Report

DR. REDDY'S

|                 |              |                        |         |
|-----------------|--------------|------------------------|---------|
| Data Filename   | 090209013.d  | Sample Name            | TKM-050 |
| Sample Type     | Sample       | Position               | Vial 11 |
| Instrument Name | Instrument 1 | User Name              |         |
| Acq Method      | ESI.m        | IRM Calibration Status | Success |
| DA Method       | DA.m         | Comment                |         |

### User Spectra

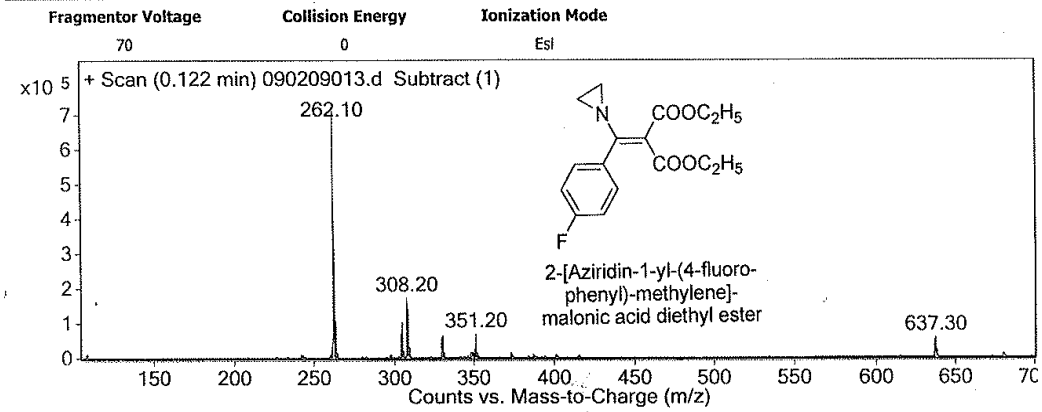

--- End Of Report ---

# IR spectrum of 20g

DR. REDDY'S LABORATORIES LIMITED

Date: 2/17/09

Time: 5:34:38 PM

TDC/CCS-ANALYTICAL RESEARCH

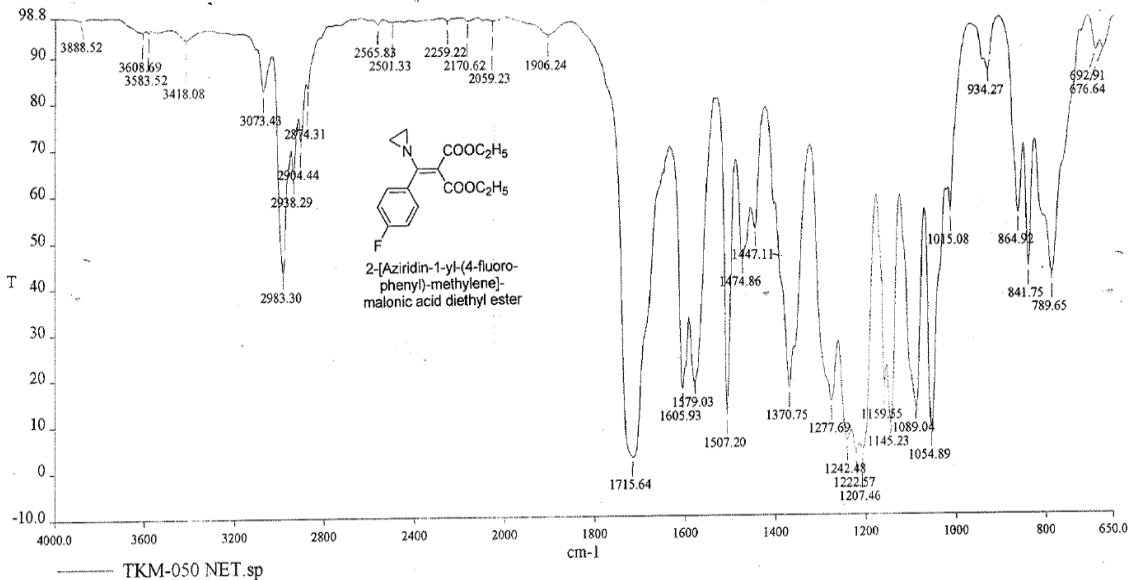

TKM-050 NET.sp

ARD0905/AR/084  
Analyst: APARNA  
SIGN: *[Signature]*  
12/02/09

# <sup>1</sup>H NMR spectrum of 20h

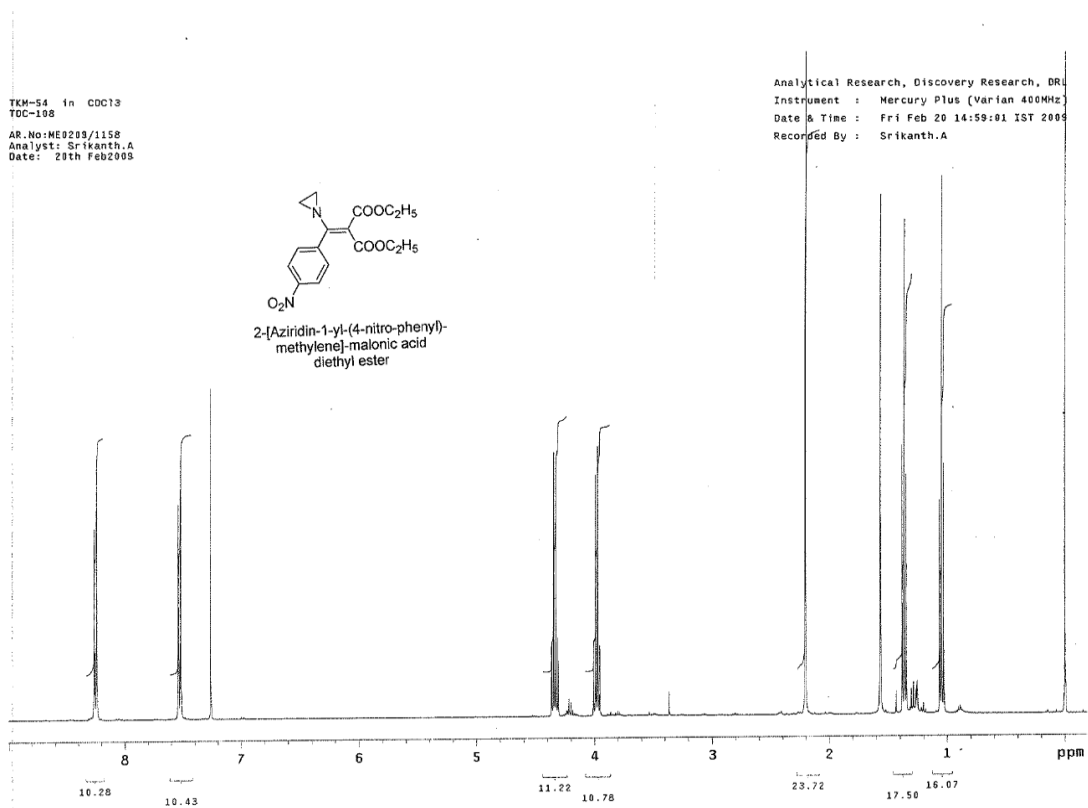

# <sup>13</sup>C NMR spectrum of 20h

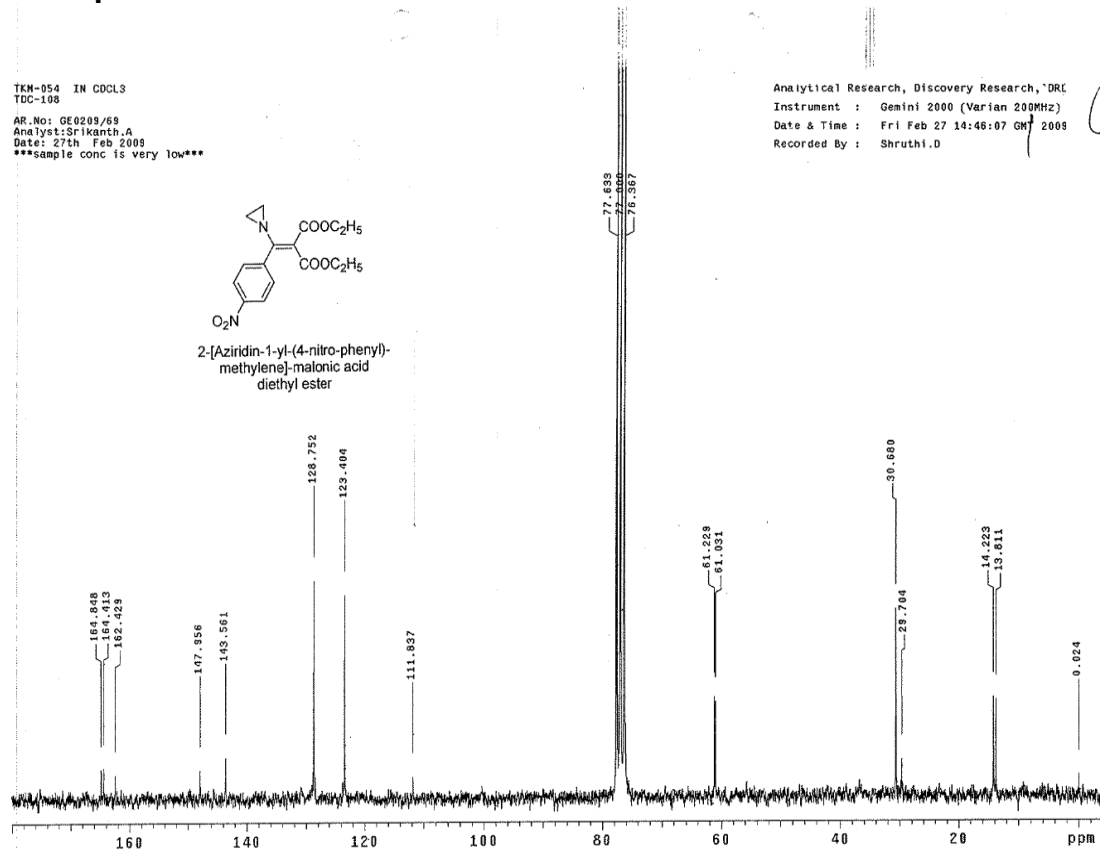

# Mass spectrum of 20h

CPS,MIYAPUR

## Mass Analysis Report

DR. REDDY'S

|                 |              |                        |         |
|-----------------|--------------|------------------------|---------|
| Data Filename   | 090218004.d  | Sample Name            | TKM-054 |
| Sample Type     | Sample       | Position               | Vial 4  |
| Instrument Name | Instrument 1 | User Name              |         |
| Acq Method      |              | IRM Calibration Status | Success |
| DA Method       | DA.m         | Comment                |         |

### User Spectra

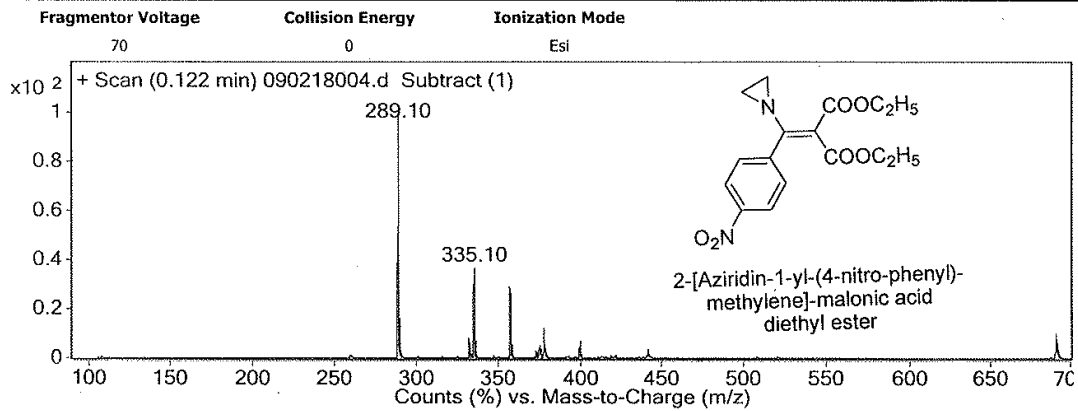

--- End Of Report ---

# IR spectrum of 20h

DR. REDDY'S LABORATORIES LIMITED

Date: 3/3/09

TDC/CCS-ANALYTICAL RESEARCH

Time: 5:27:31 PM

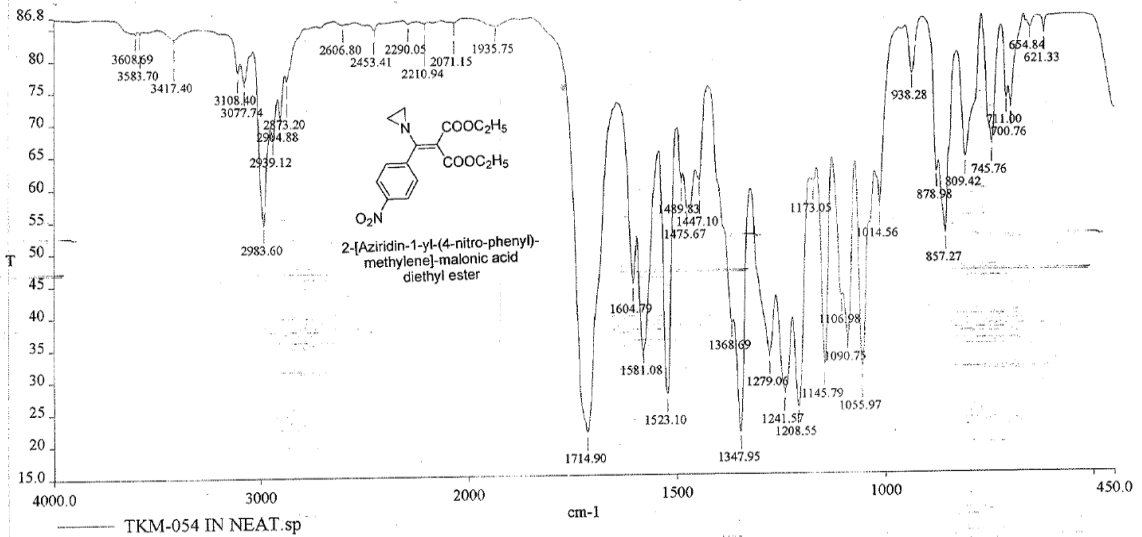

Analyst: SHYAM

SIGN: *[Signature]*

03/03/09

AK209069/897/004
